## Breast Cancer Cells and Macrophages in a Paracrine-Juxtacrine Loop

Sevgi Onal<sup>1</sup>†, Merve Turker-Burhan<sup>2††</sup>, Gizem Bati-Ayaz<sup>1</sup>, Hamdullah Yanik<sup>2†††</sup> and Devrim Pesen-Okvur<sup>2\*</sup>

1 Graduate Program in Biotechnology and Bioengineering

2 Department of Molecular Biology and Genetics, Izmir Institute of Technology, Gulbahce Kampusu, Urla, Izmir 35430, Turkey

† Present address: MacDiarmid Institute for Advanced Materials and Nanotechnology, Electrical and Computer Engineering, University of Canterbury, Christchurch 8020, New Zealand.

†† Present address: Izmir International Biomedicine and Genome Institute, Dokuz Eylul University, Izmir 35330, Turkey

††† Present address: Department of Basic Oncology, Hacettepe University Cancer Institute, Ankara 06230, Turkey

**\*Corresponding author:** Devrim Pesen-Okvur, Department of Molecular Biology and Genetics, Izmir Institute of Technology, Gulbahce Kampusu, Urla, Izmir 35430, Turkey. Phone: +90-232-750-7304 Fax: +90-232-750-7303. E-mail: [devrimpesen@iyte.edu.tr](mailto:devrimpesen@iyte.edu.tr)

Breast cancer cells (BCC) and macrophages are known to interact via epidermal growth factor (EGF) produced by macrophages and colony stimulating factor-1 (CSF-1) produced by BCC. Despite contradictory findings, this interaction is perceived as a paracrine loop. Further, the underlying mechanism of interaction remains unclear. Here, we investigated interactions of BCC with macrophages in 2D and 3D. BCC did not show chemotaxis to macrophages in custom designed 3D cell-on-a-chip devices, which was in agreement with ELISA results showing that macrophage-derived-EGF was not secreted into macrophage-conditioned-medium. Live cell imaging of BCC in the presence and absence of iressa showed that macrophages but not macrophage-derived-matrix modulated adhesion and motility of BCC in 2D. 3D co-culture experiments in collagen and matrigel showed that BCC changed their multicellular organization in the presence of macrophages. In custom designed 3D co-culture cell-on-a-chip devices, macrophages promoted and reduced migration of BCC in collagen and matrigel, respectively. Furthermore, adherent but not suspended BCC endocytosed EGFR when in contact with macrophages. Collectively, our data revealed that macrophages showed chemotaxis towards BCC whereas BCC required direct contact to interact with macrophage-derived-EGF. We propose that the interaction between cancer cells and macrophages is a paracrine-juxtacrine loop of CSF-1 and EGF, respectively.

## 35 Introduction

36 Metastasis is the leading cause of death for cancer patients. As cancer cells metastasize, they interact  
37 with various extracellular molecules, growth factors and stromal cells such as macrophages and  
38 fibroblasts [1, 2].

39 Growth factors act as intercellular signaling molecules that promote various processes such as cell  
40 growth, adhesion and motility. Growth factors can be soluble, transmembrane or extracellular matrix  
41 bound proteins [3, 4]. Epidermal growth factor (EGF) is one of the seven ligands of EGF receptor  
42 (EGFR also known as ErbB1), and is the most studied member of the ErbB receptor family. While other  
43 EGFR ligands can bind to different members of the ErbB family, EGF binds only to EGFR [5-7]. In  
44 addition, EGFR expression correlates with poor prognosis in breast cancer [8, 9]. Mature EGF (6 kDa)  
45 is not detected in conditioned medium, suggesting that EGF is not secreted and direct contact may be  
46 required [10, 11]. It is also known that soluble EGF and conditioned medium of macrophages do not  
47 promote breast cancer cell invasion into collagen matrix and breast cancer cells do not invade into  
48 collagen if they are not co-cultured with macrophages[12]. Furthermore, it has been shown that EGFR  
49 can be activated with membrane bound ligands [13, 14]. Macrophage colony-stimulating factor (CSF-1)  
50 is known to regulate the proliferation, differentiation, survival and motility of macrophages [15]. Other  
51 ligands such as the EGF-like ligand Heregulin  $\beta$ 1 (HRG $\beta$ 1) binding to ErbB3 or ErbB4, and CXCL12  
52 binding to CXCR4 abundant on invasive breast cancer cells relies on EGF and CSF-1 interaction to  
53 induce breast cancer metastasis *in vivo* [16].

54 Macrophages are stimulated towards the tumor micro-environment by growth factors and chemokines,  
55 for example, CSF-1. Macrophages have been shown to promote tumor growth; facilitate angiogenesis,  
56 lymphangiogenesis, stromal remodeling; change multicellular organization of cancer cells; induce  
57 invasion and metastasis [17-20]. Tumor-associated macrophages support the migration of cancer cells  
58 by the growth factors they express, for example, EGF. Thus, macrophages and their interactions with  
59 cancer cells are promising targets to work on for discovery of new therapeutic agents and approaches  
60 to manage cancer metastasis. To achieve this goal, the underlying mechanism of interactions between  
61 macrophages and cancer cells needs to be well-defined. While their interactions have been perceived  
62 as a paracrine loop of EGF and CSF-1 [21, 22], an in-depth understanding of the mechanistic basis of  
63 this interaction is lacking.

64 Most widely used *in vitro* cell culture systems neither reflect the organization and complexity of the *in*  
65 *vivo* microenvironment nor provide extensive spatial and temporal control. On the other hand,  
66 microfluidics based cell-on-a-chip devices can provide both 2D and 3D settings, position multiple cell  
67 types at specific locations, provide static and dynamic chemical and physical inputs and gradients,  
68 mimic physiologically relevant cell-to-cell and cell-to-matrix interactions and enable real time monitoring  
69 or visualization [23-27]. Therefore, cell-on-a-chip devices are now proving to be a necessary step which  
70 links *in vitro* studies, *in vivo* animal models and clinical trials.

71 Here, using a multidisciplinary approach including classical and state-of-the-art techniques such as live  
72 cell imaging and cell-on-a-chip devices, we showed that the interaction between BCC and  
73 macrophages is a paracrine – juxtacrine loop and direct contact is required for the activity of  
74 macrophage-derived-EGF on breast cancer cells.

## 75 Results

### 76 BCC did not show chemotaxis towards macrophages whereas macrophages showed 77 chemotaxis towards BCC

78 To determine the mechanism of interaction between macrophages and BCC on the EGF – CSF-1 axis,  
79 in particular to determine how macrophage-derived-EGF acts on BCC, we first investigated chemotaxis  
80 in 3D cell culture. To assess invasion and migration capacity of breast cancer cells (BCC) and  
81 macrophages (MC), we first used Invasion-Chemotaxis chips (IC-chips) with three tandem channels  
82 (Fig. 1A). Here, constituents from adjacent channels had access to each other through gaps between  
83 regularly spaced posts that formed the borders between channels. Cell-free growth factor reduced  
84 matrigel was loaded into the middle channel. After matrix polymerization, either culture medium  
85 supplemented with 10% fetal bovine serum (FBS) or serum free medium was loaded into the  
86 chemoattractant (bottom) channel. Finally, BCC or MC suspended in serum free medium were loaded  
87 to the cell (top) channel. The chips were incubated upright to allow cells settle down at the medium-  
88 matrix interface and start invasion and migration at the same borderline. IC-chips were imaged at day 1  
89 and day 3 using confocal microscopy (Fig. 1B). Image analysis showed that both BCC and MC showed  
90 prominent migration towards FBS but not serum free medium ( $p < 0.05$ ) (Fig. 1C).

91 To evaluate chemotaxis between cells, we used a custom cell-on-a-chip device comprising a total of  
92 five tandem channels again connected to each other with regularly spaced posts. We loaded cell-free  
93 matrix into the middle channel (2 mm width) and then different cell-laden matrices into the channels at  
94 the left and right of the middle channel. The two outermost channels, were filled with serum free culture  
95 medium. Such a cell-on-a-chip design allowed assessment of the chemotactic responses between two  
96 cell types in a 3D cell culture setting. Here, macrophages showed low level of migration towards BCC  
97 which, on the other hand, did not migrate (Fig. S1A, B). To remove any limitations due to the absence  
98 of serum and long distances between cells, we used the Distance Dependent Interactions chips (DDI-  
99 chips) where the distance between the two cell types changed from 0.3 mm to 3 mm, and the cell  
100 culture medium in the reservoirs contained serum [28]. We first examined diffusion of 10 kDa  
101 fluorescent dextran in the DDI-chip experimentally. Fluorescent microscopy images acquired after one  
102 day showed that a gradient of the dextran molecule formed in the DDI-chip, as expected (Fig. 1D, E).  
103 We then examined diffusion of 10 kDa dextran molecule in the DDI-chip using VCell [29]. Simulation  
104 results for the duration of one day showed formation of a gradient of the dextran molecule, in  
105 agreement with the experimental results (Fig. 1F, G, Supplementary Movie S1). Control experiments  
106 where only BCC or only macrophages or BCC across normal mammary epithelial cells were cultured in  
107 the DDI-chip showed no significant migration (Fig. S1C, D, E). However, when BCC and macrophages  
108 were across from each other in the DDI-chip, macrophages showed prominent migration towards BCC  
109 which still did not migrate notably (Fig. 1H, I). These results showed that BCC did not show chemotaxis  
110 towards macrophages whereas macrophages did so.

111 To confirm that BCC provided a soluble signal whereas macrophages did not, we determined the EGF  
112 and CSF-1 content of macrophage- and BCC-conditioned medium (CM), Macrophage- and BCC-  
113 derived-extracellular matrix (ECM) and the cells themselves using ELISA. The majority of the protein  
114 and the growth factors were present in cells, as expected (Table 1). The ECMs from macrophages and  
115 BCC constituted about 37% and 19% of the total protein and they contained 7% and 12% of EGF and

116 CSF-1, respectively. The conditioned medium of macrophages was 1% of the total protein content and  
117 it contained only 1% of the total EGF, showing that EGF was not secreted. Yet, the conditioned medium  
118 of BCC was almost 1% of the total protein content and contained 35% of the total CSF-1 showing that  
119 CSF-1 was secreted. Concentration of EGF in macrophage-CM was 0.0009 ng/ml whereas that of  
120 CSF-1 in BCC-CM was 0.544 ng/ml. We also measured EGF content of Matrigel (Corning) where  
121  $[EGF]_{\text{avg in Matrigel}}$  is given as 0.7 ng/ml by the manufacturer within the range of 0.5 – 1.3 ng/ml. In  
122 agreement, we found  $[EGF]_{\text{Matrigel}}$  to be 0.978 ng/ml, while there is no CSF-1 in matrigel. Together, cell-  
123 on-a-chip and ELISA results indicated that macrophages could show chemotaxis to BCC-derived-CSF-  
124 1 whereas BCC did not show chemotaxis to macrophages, consistent with the lack of EGF in  
125 macrophage-conditioned-medium.

### 126 **Macrophages but not macrophage-derived-matrix modulated adhesion and motility of BCC in an** 127 **EGF-dependent manner**

128 Since growth factors may bind ECM, we investigated adhesion and motility of BCC on macrophage-  
129 derived-ECM. BCC were imaged live as they were introduced onto glass coated with matrigel (mgel),  
130 glass coated with macrophage-derived-ECM (MCm), glass dispersedly coated with macrophages (MC)  
131 and bare glass surfaces. During the first fifty minutes, BCC on mgel surfaces attached and spread,  
132 increasing their cell area 4.79 fold ( $p < 0.0001$ ). Yet, BCC on the other surfaces did not spread  
133 significantly except on glass surface where there was a small (1.075 fold) increase in cell area  
134 ( $p < 0.05$ ). At fifty minutes, cell area on mgel surfaces was larger than those on all other surfaces  
135 ( $p < 0.005$ ) (Fig. 2A). Circularity of BCC decreased in time on mgel ( $p < 0.001$ ), but not on other surfaces.  
136 At fifty minutes, circularity of BCC on mgel surfaces was smaller than those on all other surfaces  
137 ( $p < 0.001$ ) (Fig. 2B). Aspect ratio of BCC did not change in time or between different surfaces (Fig. 2C).  
138 These results showed that presence of macrophages or macrophage-derived-ECM did not support  
139 initial cell attachment as well as matrigel.

140 What is more, we analyzed cell morphology at the end of 5 hours on each of the above mentioned  
141 surfaces in the presence and absence of iressa (gefitinib), an EGFR inhibitor [30]. Areas of BCC  
142 decreased from mgel ( $784.5 \pm 30.9 \mu\text{m}^2$ ) to MCm ( $704.1 \pm 58.9 \mu\text{m}^2$ ) to MC ( $383.5 \pm 32.3 \mu\text{m}^2$ ) to glass  
143 ( $245.1 \pm 6.6 \mu\text{m}^2$ ) surfaces ( $p < 0.036$ ). Although the addition of iressa did not change the cell area of  
144 BCC on MCm and glass surfaces, it decreased and increased cell area on mgel (0.74 fold) and MC  
145 (1.24 fold) surfaces, respectively ( $p < 0.0001$ ) (Fig. 2D). Mgel is a rich surface as shown by effective  
146 adhesion of cells on it in the first fifty minutes unlike the other surfaces tested: The average cell area on  
147 mgel surfaces at fifty minutes was  $1661.9 \pm 302.5 \mu\text{m}^2$ , which was interestingly smaller than that at the  
148 end of 5 hours suggesting cells might be exploring less at later time points ( $784.5 \pm 30.9 \mu\text{m}^2$ )  
149 ( $p < 0.016$ ). Yet, mgel surfaces allowed cell adhesion to mature and presence of iressa reduced cell area  
150 on mgel surfaces to ( $582.6 \pm 32.7 \mu\text{m}^2$ ) ( $p < 0.0001$ ). While the effect of iressa on cell area on MC surface  
151 may seem counterintuitive, the experimental set-up here is different in the sense that adhesion is  
152 examined in the first five hours of cells being introduced to a surface unlike many examples in the  
153 literature where adhesion and effect of iressa is examined in mature cultures. EGF is supposed to  
154 promote motility only when the pre-requirement of adhesion is satisfied. Here, BCC barely adhered on  
155 MC surfaces in the initial fifty minutes and had 2-fold smaller cell area compared to mgel surfaces at  
156 the end of 5 hours. Thus when the input for motility is quenched by iressa, cells could adhere better  
157 starting from suspended cells in medium. Circularity of BCC increased from mgel to MCm to MC to

158 glass ( $p < 0.0001$ ). Presence of iressa increased the circularity of BCC on mgel and glass surfaces  
159 whereas it decreased that on MC ( $p < 0.0001$ ) surfaces (Fig. 2E). Aspect ratio of BCC was similar  
160 between mgel and MCm and decreased from MCm to MC to glass surfaces ( $p < 0.0001$ ). Presence of  
161 iressa decreased and increased aspect ratio of BCC on mgel and MC surfaces, respectively ( $p < 0.016$ )  
162 (Fig. 2F). Cell area, circularity and aspect ratio changes were also consistent with each other as less  
163 adherent cells tend to be more circular and have a smaller aspect ratio. These results showed that the  
164 presence of macrophage-derived-ECM supported adhesion and spreading of BCC as well as matrigel  
165 and better than the presence of macrophages at the end of five hours. Presence of iressa affected  
166 adhesion on mgel and MC but not MCm surfaces suggesting that EGF was present in matrigel and on  
167 macrophages.

168 Furthermore, we examined BCC motility on mgel, MCm and MC surfaces in the presence and absence  
169 of iressa during the first 5 hours of being introduced onto the surfaces of interest (Fig. 2G - I). The  
170 experimental set-up here is different in the sense that motility is examined in the initial hours of being  
171 introduced to a surface unlike many examples in the literature where motility is examined in mature  
172 cultures. Average speed of BCC on mgel ( $0.48 \pm 0.06 \mu\text{m}/\text{min}$ ) surfaces was larger than those on MCm  
173 ( $0.18 \pm 0.02 \mu\text{m}/\text{min}$ ) and MC ( $0.09 \pm 0.01 \mu\text{m}/\text{min}$ ) surfaces ( $p < 0.00002$ ). Iressa did not have an effect on  
174 average speed of BCC on mgel most likely because the rich composition of matrigel provided  
175 compensation. Iressa did not change average speed of BCC on MCm surfaces as well, considering  
176 cells on MCm surface already had low motility, their average speed did not change probably because at  
177 that stage the cells could not effectively utilize EGF signaling, because the pre-requirement for  
178 adhesion was not satisfied. Cells can be motile only after they have adhered well enough and thus  
179 there is a positive feedback from adhesion to motility. Thus MCm surfaces promoted cell adhesion but  
180 not motility. Yet, presence of iressa increased the average speed of BCC on MC surfaces 2.5 fold  
181 ( $p < 0.00001$ ), which was consistent with the increase in cell adhesion in the presence of iressa on MC  
182 surfaces. When iressa is present, the EGF induced motility signaling is quenched and the cells have a  
183 chance to adhere first. Consequently, with increased adhesion, the adhesion prerequisite for motility is  
184 satisfied and motility can increase. Lastly, persistence of BCC on all surfaces was similar (Fig. 2I).  
185 Finally, any EGF mediated effect on cell adhesion and motility was apparent on MC but not MCm  
186 surfaces. These results aligned with ELISA results showing majority of EGF was associated with  
187 macrophages.

## 188 **Macrophages promoted and reduced migration of BCC in collagen and matrigel, respectively**

189 As cells can also interact with membrane-bound growth factors, it is possible that BCC interact with  
190 EGF which is macrophage-bound. In this case, direct contact with macrophages is likely to modulate  
191 phenotypes of BCC. Results for adhesion and motility of BCC on MC surfaces reported above  
192 supported such a juxtacrine mode of interaction. Here, we further investigated BCC and macrophages  
193 in 3D co-culture (Fig. 3 and Fig. 4). The multicellular organization of BCC changed in collagen and  
194 matrigel hydrogel drops in the presence of macrophages. In collagen, BCC appeared as round or  
195 elongated and along or elongated and perpendicular cells as well as clusters along the cell-laden  
196 hydrogel drop border. On day 5 of co-culture, presence of macrophages changed the percentile  
197 distribution of these structures ( $\chi^2 p < 5.77303E-14$ ). Percentage of along and clustered cells decreased  
198 and increased, respectively (Percent t-test  $< 0.05$ ). The number of round cells and clusters per hydrogel  
199 drop decreased (1.9-fold) and increased (24-fold), respectively ( $p < 0.041$ ). In matrigel, BCC alone

200 organized into star-like multicellular complexes, branched structures or lines of cells. On day 5 of co-  
201 culture, presence of macrophages changed the percentile distribution of these structures ( $\chi^2$   $p < 0.002$ ).  
202 Percentage of branch and line structures decreased and increased, respectively (Percent t-test  $< 0.05$ ).  
203 The number of branched structures decreased 3-fold per hydrogel drop ( $p < 0.029$ ). Thus 3D co-culture  
204 results showed that BCC and macrophages did interact, resulting in changes in single and multi-cellular  
205 organization in 3D.

206 To determine cell migration in 3D in a more controlled manner, we used a custom 3D co-culture cell-on-  
207 a-chip device, where we seeded BCC or macrophages alone or in combination in collagen or matrigel  
208 into a channel sided by channels containing cell-free hydrogels (Fig. 5). 5% FBS supplemented RPMI  
209 medium was used in the medium reservoirs adjacent to the cell-free hydrogels to retain the 3D co-  
210 culture on-chip over 5 days. In collagen, both mono- and co-cultured cells showed increased migration  
211 from day 1 to day 3 to day 5 ( $p < 0.05$ ). What is more, BCC alone showed less migration than  
212 macrophages alone and presence of macrophages increased the migration distance 2.8 fold on day 5  
213 ( $p < 1.54E-06$ ). In matrigel, both mono- and co-cultured cells showed increased migration from day 1 to  
214 day 5 ( $p < 0.05$ ). Migration of macrophages was significantly lower in matrigel than that in collagen  
215 ( $p < 0.005$ ). Furthermore, BCC alone showed more migration than macrophages alone and presence of  
216 macrophages reduced the migration distance 2 fold on days 1, 3 and 5 ( $p < 0.028$ ). Thus macrophages  
217 promoted and reduced migration of BCC in collagen and matrigel, respectively.

### 218 **Adherent but not suspended BCC endocytosed EGFR when in contact with macrophages**

219 To confirm that juxtacrine signaling is the mechanism of interaction between macrophage-derived-EGF  
220 and BCC, we examined endocytosis of EGFR in BCC in suspension and adherent cell culture (Fig. 6).  
221 When starved BCC were treated with BSA, EGF or macrophages in suspension, the fraction of  
222 membrane EGFR was the highest for BCC treated with macrophages than with BSA than with EGF  
223 ( $p < 0.0015$ ) (Fig. 6A, B). EGFR was expected to be internalized in the presence of macrophage-  
224 derived-EGF. Yet interactions of BCC with macrophages did not promote receptor internalization, which  
225 was probably because BCC in suspension did not have enough traction to disengage the macrophage-  
226 bound-EGF, in agreement with previous work [31]. In adherent culture on the other hand, BCC cells  
227 transfected with EGFR-GFP starved and treated with macrophages endocytosed EGFR (69% of cells)  
228 more and less than those treated with BSA (11% of cells) and EGF (92% of cells), respectively ( $\chi^2$   
229  $p < 0.035$ ) (Fig. 6C, D and Supplementary Movie S2, S3, S4).

230

### 231 **Discussion**

232 Although breast cancer cells (BCC) and macrophages are accepted to interact in a paracrine loop of  
233 epidermal growth factor (EGF) and colony stimulating factor-1, direct evidence to support this  
234 perception is lacking and the underlying mechanism of interaction remains unclear. We investigated the  
235 interaction between BCC and macrophages using a multidisciplinary approach. Our results support the  
236 hypothesis that a juxtacrine interaction is required for the activity of macrophage-derived-EGF on breast  
237 cancer cells, and thus the interaction between cancer cells and macrophages is a paracrine-juxtacrine  
238 loop of CSF-1 and EGF, respectively (Fig. 7).

239 Growth factors can act either in soluble or ECM-bound or cell-bound [7]. It should be noted that our  
240 experiments did not involve any exogenous EGF, the only source of EGF were the macrophages. Thus,  
241 we were able to examine cell-to-cell communication in a physiologically relevant microenvironment that  
242 mimicked the *in vivo* conditions. Future work could benefit from molecular knockdown of EGF, which is  
243 dispensable in the context of current work. Our first results showed that CSF-1 was secreted and thus a  
244 chemotactic response by macrophages towards BCC was possible and observed whereas EGF was  
245 not detected in the conditioned medium of macrophages and a chemotactic response by BCC to  
246 macrophage-derived-EGF was not observed. Secondly, we examined whether macrophage-derived-  
247 EGF could act as an ECM-bound growth factor. Here, we used mgel surfaces as positive controls. An  
248 important difference between mgel and MC surfaces was that unlike the latter, the former presented a  
249 rich ECM composition. Iressa decreased adhesion on mgel surfaces as expected since matrigel is a  
250 rich mixture of ECM proteins and growth factors. Presence of EGF can promote adhesion via crosstalk  
251 between integrins and growth factor receptors and presence of iressa can remove the pro-adhesion  
252 input from EGFR [32-35]. EGF is also known to promote motility. Macrophages appeared to inhibit cell  
253 adhesion and presence of iressa removed the pro-motility input from EGFR. This result was in  
254 agreement with the previous studies which found that EGF can promote rounding of adherent cells [36],  
255 inhibit adhesion [37] and promote a motile phenotype [38].

256 Adhesion of MDA-MB-231 cells, used here as a model for BCC, on collagen IV has been shown to  
257 increase in the presence of EGF and this increase can be reverted by EGFR inhibitors [39]. However,  
258 we cannot directly compare our results with those reported in that study because in our experimental  
259 system, soluble EGF is not present. Our results collectively indicated that macrophage-derived-EGF  
260 was cell-bound. On the other hand, in that study EGF has been shown to inhibit adhesion for cells with  
261 high EGFR expression. Thus it appears that the form of EGF – soluble or immobilized – and the  
262 number of EGFR per cell can modulate the effect of EGF on cell adhesion.

263 Iressa dependent differences on adhesion and motility were observed on macrophages but not on  
264 macrophage-derived-ECM, directing us to the investigation of cell-to-cell contact based interactions. In  
265 matrigel hydrogel drops, in the presence of macrophages, the number and percentage of branched  
266 structures decreased and the percentage of line structures increased suggesting that macrophages  
267 could induce a more dispersed organization of BCC. On the other hand, changes in the single and  
268 multi-cellular organization in collagen suggested that BCC and macrophages could cluster in a poor  
269 microenvironment such as collagen.

270 In 3D co-culture cell-on-a-chip devices, macrophages promoted and reduced migration of BCC in  
271 collagen and matrigel, respectively. However, it is possible that the effect of CSF-1 on macrophages is  
272 proliferation rather than migration. In collagen, BCC alone did not migrate as well due to the poor  
273 composition of collagen; whereas interactions with macrophages, which acted as rich sources of EGF,  
274 promoted cell migration, as expected. Our 3D migration results for cells in collagen in custom cell-on-a-  
275 chip devices are also in agreement with previous studies where dissemination of tumor cells is induced  
276 by contact with macrophages [12, 40]. Direct contact with macrophages is also known to induce other  
277 changes in cancer cells, such as formation of more invadopodia, which EGF is known to enhance [41].  
278 On the other hand, in 3D co-culture cell-on-a-chip devices comprising matrigel, BCC alone could  
279 migrate well due to the rich composition of matrigel which can activate both integrins and growth factor  
280 receptors; yet as BCC encountered macrophages which acted as concentrated point sources of EGF,

281 they migrated less. This was most likely because local amount of EGF, that was the sum of EGF  
282 present in matrigel plus macrophage-derived-EGF, became too high and inhibited migration of BCC,  
283 satisfyingly consistent with biphasic EGF dependence of EGFR auto-phosphorylation [42] and results of  
284 *in vivo* invasion assays performed with microneedles stably inserted into xenograft tumors in mice [43].

285 Our results on endocytosis of EGFR in suspension BCC when stimulated with macrophages are  
286 consistent with those of a study where cells were stimulated with surface immobilized EGF which has  
287 been suggested to be useful for studying juxtacrine signaling [44]. Furthermore, our results on  
288 endocytosis of EGFR in adherent BCC when stimulated with macrophages align with those of a study  
289 where cells were stimulated with EGF-beads [45]. These results are also in agreement with our ELISA  
290 results where EGF was detected with macrophages but not macrophage derived matrix or macrophage  
291 conditioned medium.

292 RAW264.7 is a commonly used cell line for convenience. In addition, macrophages are known to  
293 polarize into M1 and M2 phenotypes [46-48]. Using primary cells and examination of macrophage  
294 polarization under 3D co-culture conditions is beyond the scope of current work, yet, would be a focus  
295 of future work.

296 EGF – CSF-1 based interactions between cancer cells and macrophages have long been perceived as  
297 a paracrine loop. Using a multidisciplinary approach, our results revealed that cell-to-cell contact was  
298 required for the activity of macrophage-derived-EGF on BCC. To the best of our knowledge, this is the  
299 first study providing exhaustive evidence and showing that the mechanism of interaction between  
300 macrophage-derived-EGF and BCC is juxtacrine signaling. The paradigm shift we provide is likely to  
301 promote a better understanding of cell-to-cell communication in both health and disease states, and  
302 well-designed cellular microenvironments to control and assay cell-to-cell interactions in tissue  
303 engineering applications and finally better therapeutic and diagnostic approaches in the future. While  
304 our study reports novel results on the interactions of cancer cells and macrophages, the state-of-the-art  
305 cell-on-a-chip and 3D cell culture platforms developed here allow to use any cell, hydrogel and medium  
306 type of interest to study different cell-to-cell, cell-to-molecule, and cell-to-matrix interactions.

307

## 308 **Materials and Methods**

### 309 **Cell culture**

310 MDA-MB-231 (BCC), RAW264.7 macrophages and MCF10A were acquired from ATCC (LGC Standards  
311 GmbH, Germany). BCC and macrophages were grown in tissue culture treated petri dishes in DMEM  
312 supplemented with 10% FBS, 1X penicillin-streptomycin, 1X L-glutamine and in non-treated petri dishes  
313 in RPMI supplemented with 5% FBS, 1X penicillin-streptomycin, 1X L-glutamine, respectively, at 37°C,  
314 5% CO<sub>2</sub>. BCC and macrophages were trypsinized and mechanically collected for sub-culturing,  
315 respectively. MCF10A were cultured as previously described [49].

316

### 317 **Cell-on-a-chip experiments**

318 Fabrication of the cell-on-a-chip devices was performed as previously described [28] except that IC-chips  
319 (invasion-chemotaxis chips) were provided by Initio Biomedical (Turkey). In IC-chips, cell-free growth  
320 factor reduced matrigel (354230, Corning) was loaded into the middle channel. After matrix



321 polymerization at 37°C and 5% CO<sub>2</sub>, either culture medium supplemented with 10% fetal bovine serum  
322 (FBS) or serum free medium, and either DsRed-labelled BCC or CellTracker Green stained MC  
323 suspended in serum free medium (1x10<sup>6</sup> cells/ml) were loaded to the corresponding channels. The chips  
324 were incubated in a perpendicular orientation where the cells could flow downward onto the medium-  
325 matrix interface. IC-chips were imaged at day 1 and day 3 using a Leica SP8 confocal microscope. In  
326 other cell-on-a-chip devices, cell laden (6.5x10<sup>6</sup> cells/ml) and cell-free matrigel (354234, Corning) or  
327 collagen gels (354249, Corning) were loaded to the corresponding channels and polymerized at 37°C  
328 and 5% CO<sub>2</sub> for 30 min. Then culture media were loaded into the medium reservoirs. The samples were  
329 kept at 37°C and 5% CO<sub>2</sub> for 7-14 days. Partially overlapping raster-scan phase-contrast images of fields  
330 of interest in cell-on-a-chip devices were acquired on at least days 1, 3 and 5 using an Olympus CX41  
331 microscope or a Euromex OX.3120 microscope equipped with a Dino-Lite Eyepiece Camera and imaging  
332 software (DinoCapture 2.0). Images were stitched using Photoshop (Adobe).

333

334 For quantification of migration of co-cultured cells in cell-on-a-chip devices, each region between two  
335 PDMS posts was defined as an ROI and the maximum distance migrated in each ROI was measured  
336 using ImageJ/Fiji [50].

337

### 338 **Protein Quantification and ELISA**

339 Macrophage-derived-matrix was prepared as described below. At least three biological and three  
340 technical repeats were carried out and representative results were reported.

341

342 1.158x10<sup>6</sup> RAW 264.7 cells were seeded to get confluent macrophage cell matrix (MCm). The cells were  
343 cultured for 7 days before sample collection. 50% of old medium was replaced with fresh culture medium  
344 in every two days. At 5<sup>th</sup> day, the old medium was replaced with fresh serum free culture medium and  
345 cells were cultured 2 days to produce macrophage conditioned medium. At 7<sup>th</sup> day, the conditioned media  
346 was collected and filtered (0.2 µm PES) into a tube. 2M urea was used to remove cells. Urea supernatant  
347 including the detached cells was centrifuged at 400 rcf for 5 min. The cell pellet was suspended in 1X  
348 Diluent B of ELISA Kit (Abcam). After removing cells, the matrix remained in the petri dish was rinsed  
349 with 1X PBS four times. At last, the matrix was scraped and collected with 1X Diluent B and filtered (0.2  
350 µm PES) into a tube. All of the samples were stored at -80°C till measuring their EGF content with EGF  
351 Mouse ELISA. MDA-MB-231 cells were processed similarly. All the samples were processed for Bradford  
352 (39222.02, Serva), EGF Mouse ELISA (ab100679, Abcam) and CSF Human ELISA (ab100590, Abcam)  
353 assays according to the manufacturers' instructions.

354

### 355 **Live cell imaging**

356 BCC were starved in serum free Leibowitz's medium supplemented with BSA, collected using cell  
357 dissociation buffer (Biological Industries, Israel) and re-suspended in starvation medium and added on  
358 glass, matrigel, macrophage-derived-matrix or macrophages. Imaging was started immediately using an  
359 Olympus IX70 microscope equipped with a heating plate set to 37°C. Phase-contrast images were  
360 captured with a Euromex camera with the ImageFocus Software every 30 seconds.

361

362 For mgel surfaces, 100 µg/ml matrigel was used for coating glass coverslips. For MCm surfaces,  
363 macrophage derived matrix was prepared by seeding 48000 RAW 264.7 cells per 15mmx15mm area of  
364 a glass coverslip and culturing cells for 7 days prior to the live cell imaging experiment. Macrophages

365 were removed using 2M urea. For MC surfaces, 6000 cells were seeded, cultured for 7 days and used  
366 after rinsing with serum-free medium.

367

368 For live cell experiments on MC surfaces, BCC and macrophages were stained with CellTracker Green  
369 CMFDA or Blue CMAC (Molecular Probes), respectively, according to the manufacturer's instructions.  
370 Fluorescence images were captured for the first and last time points.

371

372 BCC were treated with 2  $\mu$ M Iressa ('Gefitinib' sc-202166, Santa Cruz Biotechnology) for 16 hours prior  
373 to using the cells in live cell imaging experiments. Medium with Iressa was replenished just before live  
374 cell imaging.

375

376 Cell area, circularity and aspect ratio of the cells were measured from manually tracked cell boundaries  
377 using ImageJ. For motility, cell nuclei were manually tracked over time. Speed was calculated as the ratio  
378 of the net distance travelled to time for each time interval of 15 minutes. Persistence was calculated as  
379 the ratio of the net distance to the total distance.

380

### 381 **3D Co-culture hydrogel experiments**

382  $2 \times 10^6$  cells/ml of BCC and macrophages were seeded alone or together in 1:1 matrigel or 2 mg/ml  
383 collagen hydrogel drops of 2  $\mu$ l in multi-well plates which were placed upside down during hydrogel  
384 polymerization. Another 15  $\mu$ l of the corresponding cell-free hydrogel was then polymerized on the cell-  
385 laden hydrogels. Next, macrophage culture medium was added to the wells, and cells were cultured at  
386 37°C and 5% CO<sub>2</sub>. Image acquisition was performed as for cell-on-a-chip experiments.

387 The outermost 328  $\mu$ m (250 pixels) ring of the cell-laden matrigel drops was examined. A line structure  
388 was defined to contain at least 2 cells and be more than 100 pixels in length. A branch was defined to  
389 contain at least 3 cells and to have a 'Y' or 'T' shape. A multicellular complex was defined to contain at  
390 least 4 cells which had connections with each other.

391

392 The boundary at the cell-laden and cell-free collagen was examined. An along cell was defined to be  
393 aligned along the boundary. A perpendicular cell was defined to be perpendicular to the boundary. Round  
394 and clustered cells at the boundary were also counted.

395

396 Assignments of different structures were performed by two or three independent observers and cross-  
397 checked.

398

### 399 **Endocytosis in suspended cells**

400 BCC were starved and incubated in a cell dissociation buffer (Biological Industries, Israel) for collection.  
401 BCC were then treated with 3.5 nM EGF or macrophages in suspension for 10 minutes. Samples were  
402 then fixed with 4% paraformaldehyde and processed for immunostaining with EGFR (D38B1) XP rabbit  
403 mAb (4267, Cell Signaling Technology, 1:100), anti-rabbit secondary antibody Alexa Fluor 555 Conjugate  
404 (4413, Cell Signaling Technology, 1:200) and Alexa Fluor 488 Phalloidin (8878, Cell Signaling  
405 Technology, 1:200). Fluorescence images were captured with an Olympus IX83 microscope equipped  
406 with a DP73 camera and CellSens software. Fluorescence signal of EGFR localized to the membrane  
407 divided by the total cellular signal was measured using ImageJ.

408

### 409 **Endocytosis in adherent cells**

410 BCC were transiently transfected with EGFR-GFP, a gift from Alexander Sorkin (Addgene plasmid #  
411 32751). BCC were starved and treated with 3.5 nM EGF or suspended macrophages labelled with Blue  
412 CMAC (Molecular Probes). Images were acquired with a Zeiss Observer microscope equipped with an  
413 incubation chamber set to 37°C, an MRm camera and Zen software. BCC showing inward movement of  
414 EGFR-GFP from the cell membrane to the cytosol were counted as endocytosis positive.

415

### 416 **Image analysis**

417 Photoshop (Adobe) and ImageJ (NIH) were used for image processing and analysis.

418

### 419 **Diffusion in DDI-chip**

420 Matrigel was diluted 1:1 with medium supplemented with 10 kDa fluorescent dextran (final concentration  
421 5 µM) and loaded into the right matrix channel. Fluorescent dextran (final concentration 10 µM) was  
422 loaded into the right medium channel. Matrigel diluted 1:1 with medium was loaded into the middle and  
423 left channels. Medium was loaded into the left medium channel. Fluorescence images were acquired  
424 after one day.

425

### 426 **Simulation**

427 VCELL [29] was used for simulation of diffusion of fluorescent 10 kDa dextran in the DDI-chip using the  
428 parameters in the diffusion in DDI-chip experiment. The model is available on request.

429

### 430 **Statistical Analysis and Data Presentation**

431 Mann-Whitney two-tailed test (MATLAB),  $\chi^2$  test (Microsoft Excel) and two sample t-test between  
432 percents (StatPac) were used to determine significant differences in mean and percentage values,  
433 respectively. Statistical significance was taken as  $p < 0.05$ . Data were represented as means  $\pm$  s.e.m. All  
434 statistical test results are available as Supplementary Excel File 1. All data used for statistical analysis is  
435 available as Supplementary Excel File 2.

436

### 437 **Authors' Contributions**

438 Sevgi Onal: Investigation, Formal analysis, Validation, Visualization, Writing - Original Draft, Writing -  
439 review & editing

440 Merve Turker: Investigation, Formal analysis, Writing - Original Draft

441 Gizem Bati: Investigation, Formal analysis, Writing - review & editing

442 Hamdullah Yanik: Investigation

443 Devrim Pesen-Okvur: Conceptualization, Methodology, Investigation, Validation, Formal analysis,  
444 Visualization, Writing - Original Draft, Writing - review & editing; Supervision, Funding acquisition

445

## 446 Acknowledgements

447 This work was supported by FP7 Marie Curie Grant number PIRG08-GA-2010-276976 and IYTE  
448 Scientific Research Project Grant number 2011IYTE25 (to Devrim Pesen-Okvur). Cell-on-a-chips were  
449 fabricated at the IYTE Applied Quantum Research Center, supported by DPT (State Planning  
450 Organization) Grant 2009K120860.

451 We thank E. Koc for assisting with English language editing, O. Yalcin-Ozuysal for critical reading of the  
452 manuscript, A. Arslanoglu, E. Ozcivici and Biotechnology and Bioengineering Application and Research  
453 Center for access to fluorescence microscopes, Z. Ulger and S. Yucel for help with manual cell  
454 tracking.

455

## 456 Additional Information

457 Supplementary information accompanies this paper. Data available on request from the authors.

458

## 459 Competing financial interests:

460 Devrim Pesen-Okvur and Sevgi Onal were co-founders of INITIO Biomedical Engineering Consulting Ind.  
461 Tra. Ltd. Co., Izmir, Turkey.

462

## 463 References

- 464 1. Condeelis, J. and J.W. Pollard, *Macrophages: obligate partners for tumor cell migration, invasion, and*  
465 *metastasis*. Cell, 2006. **124**(2): p. 263-6.
- 466 2. Marusyk, A., et al., *Spatial Proximity to Fibroblasts Impacts Molecular Features and Therapeutic*  
467 *Sensitivity of Breast Cancer Cells Influencing Clinical Outcomes*. Cancer Res, 2016.
- 468 3. Massague, J. and A. Pandiella, *MEMBRANE-ANCHORED GROWTH-FACTORS*. Annual Review of  
469 Biochemistry, 1993. **62**: p. 515-541.
- 470 4. Taipale, J. and J. KeskiOja, *Growth factors in the extracellular matrix*. FASEB Journal, 1997. **11**(1): p. 51-  
471 59.
- 472 5. Carpenter, G. and S. Cohen, *Epidermal growth factor*. J Biol Chem, 1990. **265**(14): p. 7709-12.
- 473 6. Harris, R.C., E. Chung, and R.J. Coffey, *EGF receptor ligands*. Exp Cell Res, 2003. **284**(1): p. 2-13.
- 474 7. Singh, A.B. and R.C. Harris, *Autocrine, paracrine and juxtacrine signaling by EGFR ligands*. Cellular  
475 Signalling, 2005. **17**(10): p. 1183-1193.
- 476 8. Memon, A.A., et al., *The relation between survival and expression of HER1 and HER2 depends on the*  
477 *expression of HER3 and HER4: a study in bladder cancer patients*. Br J Cancer, 2006. **94**(11): p. 1703-9.
- 478 9. Sainsbury, J.R., et al., *Presence of epidermal growth factor receptor as an indicator of poor prognosis in*  
479 *patients with breast cancer*. J Clin Pathol, 1985. **38**(11): p. 1225-8.
- 480 10. Dickson, R.B., et al., *Characterization of estrogen responsive transforming activity in human breast*  
481 *cancer cell lines*. Cancer Res, 1986. **46**(4 Pt 1): p. 1707-13.
- 482 11. Vlaicu, P., et al., *Monocytes/macrophages support mammary tumor invasivity by co-secreting lineage-*  
483 *specific EGFR ligands and a STAT3 activator*. BMC Cancer, 2013. **13**.

- 484 12. Goswami, S., et al., *Macrophages promote the invasion of breast carcinoma cells via a colony-stimulating*  
485 *factor-1/epidermal growth factor paracrine loop*. *Cancer Res*, 2005. **65**(12): p. 5278-83.
- 486 13. Iwamoto, R., K. Handa, and E. Mekada, *Contact-dependent growth inhibition and apoptosis of epidermal*  
487 *growth factor (EGF) receptor-expressing cells by the membrane-anchored form of heparin-binding EGF-*  
488 *like growth factor*. *J Biol Chem*, 1999. **274**(36): p. 25906-12.
- 489 14. Singh, A.B., et al., *Membrane-associated HB-EGF modulates HGF-induced cellular responses in MDCK*  
490 *cells*. *J Cell Sci*, 2004. **117**(Pt 8): p. 1365-79.
- 491 15. F.J., P., *Macrophage Migration and Its Regulation by CSF-1*. *Int J Cell Bio*, 2012. **2012**: p. 501962.
- 492 16. Hernandez, L., et al., *The EGF/CSF-1 Paracrine Invasion Loop Can Be Triggered by Heregulin beta 1 and*  
493 *CXCL12*. *Cancer Research*, 2009. **69**(7): p. 3221-3227.
- 494 17. Dangaj, D., et al., *Cooperation between Constitutive and Inducible Chemokines Enables T Cell*  
495 *Engraftment and Immune Attack in Solid Tumors*. *Cancer Cell*, 2019. **35**(6): p. 885-+.
- 496 18. Larionova, I., et al., *Interaction of tumor-associated macrophages and cancer chemotherapy*.  
497 *Oncoimmunology*, 2019. **8**(7).
- 498 19. Pollard, J.W., *Tumour-educated macrophages promote tumour progression and metastasis*. *Nat Rev*  
499 *Cancer*, 2004. **4**(1): p. 71-8.
- 500 20. Ward, R., et al., *Monocytes and macrophages, implications for breast cancer migration and stem cell-like*  
501 *activity and treatment*. *Oncotarget*, 2015. **6**(16): p. 14687-99.
- 502 21. Knutsdottir, H., J.S. Condeelis, and E. Palsson, *3-D individual cell based computational modeling of tumor*  
503 *cell-macrophage paracrine signaling mediated by EGF and CSF-1 gradients*. *Integrative Biology*, 2016.  
504 **8**(1): p. 104-119.
- 505 22. Wyckoff, J., et al., *A paracrine loop between tumor cells and macrophages is required for tumor cell*  
506 *migration in mammary tumors*. *Cancer Research*, 2004. **64**(19): p. 7022-7029.
- 507 23. Au, S.H., et al., *Clusters of circulating tumor cells traverse capillary-sized vessels*. *Proceedings of the*  
508 *National Academy of Sciences of the United States of America*, 2016. **113**(18): p. 4947-4952.
- 509 24. Huh, D., et al., *Reconstituting Organ-Level Lung Functions on a Chip*. *Science*, 2010. **328**(5986): p. 1662-  
510 1668.
- 511 25. Jeon, J.S., et al., *Human 3D vascularized organotypic microfluidic assays to study breast cancer cell*  
512 *extravasation*. *Proceedings of the National Academy of Sciences of the United States of America*, 2015.  
513 **112**(1): p. 214-219.
- 514 26. Keenan, T.M. and A. Folch, *Biomolecular gradients in cell culture systems*. *Lab on a Chip*, 2008. **8**(1): p.  
515 34-57.
- 516 27. Li, R., et al., *Macrophage-Secreted TNF alpha and TGF beta 1 Influence Migration Speed and Persistence*  
517 *of Cancer Cells in 3D Tissue Culture via Independent Pathways*. *Cancer Research*, 2017. **77**(2): p. 279-290.
- 518 28. Ozdil, B., et al., *Fabrication of 3D Controlled in vitro Microenvironments*. *MethodsX*, 2014. **1**: p. 60-6.
- 519 29. Loew, L.M. and J.C. Schaff, *The Virtual Cell: a software environment for computational cell biology*.  
520 *Trends in Biotechnology*, 2001. **19**(10): p. 401-406.
- 521 30. Wakeling, A.E., et al., *ZD1839 (Iressa): an orally active inhibitor of epidermal growth factor signaling with*  
522 *potential for cancer therapy*. *Cancer Res*, 2002. **62**(20): p. 5749-54.
- 523 31. Ivaska, J. and J. Heino, *Cooperation between integrins and growth factor receptors in signaling and*  
524 *endocytosis*. *Annu Rev Cell Dev Biol*, 2011. **27**: p. 291-320.
- 525 32. Comoglio, P.M., C. Boccaccio, and L. Trusolino, *Interactions between growth factor receptors and*  
526 *adhesion molecules: breaking the rules*. *Current Opinion in Cell Biology*, 2003. **15**(5): p. 565-571.
- 527 33. Eliceiri, B.P., *Integrin and growth factor receptor crosstalk*. *Circulation Research*, 2001. **89**(12): p. 1104-  
528 1110.
- 529 34. Kim, H.D., et al., *Epidermal growth factor-induced enhancement of glioblastoma cell migration in 3D*  
530 *arises from an intrinsic increase in speed but an extrinsic matrix- and proteolysis-dependent increase in*  
531 *persistence*. *Mol Biol Cell*, 2008. **19**(10): p. 4249-59.

- 532 35. Yamada, K.M. and S. Even-Ram, *Integrin regulation of growth factor receptors*. Nature Cell Biology,  
533 2002. **4**(4): p. E75-E76.
- 534 36. Welsh, J.B., et al., *A negative feedback loop attenuates EGF-induced morphological changes*. J Cell Biol,  
535 1991. **114**(3): p. 533-43.
- 536 37. Maheshwari, G., et al., *Biophysical integration of effects of epidermal growth factor and fibronectin on*  
537 *fibroblast migration*. Biophys J, 1999. **76**(5): p. 2814-23.
- 538 38. Xie, H., et al., *EGF receptor regulation of cell motility: EGF induces disassembly of focal adhesions*  
539 *independently of the motility-associated PLCgamma signaling pathway*. J Cell Sci, 1998. **111 ( Pt 5)**: p.  
540 615-24.
- 541 39. Genersch, E., et al., *Prevention of EGF-modulated adhesion of tumor cells to matrix proteins by specific*  
542 *EGF receptor inhibition*. Int J Cancer, 1998. **75**(2): p. 205-9.
- 543 40. Bai, J., et al., *Contact-dependent carcinoma aggregate dispersion by M2a macrophages via ICAM-1 and*  
544 *beta2 integrin interactions*. Oncotarget, 2015. **6**(28): p. 25295-307.
- 545 41. Roh-Johnson, M., et al., *Macrophage contact induces RhoA GTPase signaling to trigger tumor cell*  
546 *intravasation*. Oncogene, 2014. **33**(33): p. 4203-12.
- 547 42. Needham, S.R., et al., *EGFR oligomerization organizes kinase-active dimers into competent signalling*  
548 *platforms*. Nature Communications, 2016. **7**.
- 549 43. Philippar, U., et al., *A Mena Invasion Isoform Potentiates EGF-Induced Carcinoma Cell Invasion and*  
550 *Metastasis*. Developmental Cell, 2008. **15**(6): p. 813-828.
- 551 44. Chen, G., Y. Ito, and Y. Imanishi, *Photo-immobilization of epidermal growth factor enhances its mitogenic*  
552 *effect by artificial juxtacrine signaling*. Biochim Biophys Acta, 1997. **1358**(2): p. 200-8.
- 553 45. Verveer, P.J., et al., *Quantitative imaging of lateral ErbB1 receptor signal propagation in the plasma*  
554 *membrane*. Science, 2000. **290**(5496): p. 1567-1570.
- 555 46. Italiani, P. and D. Boraschi, *From monocytes to M1/M2 macrophages: phenotypical vs. functional*  
556 *differentiation*. Frontiers in Immunology, 2014. **5**.
- 557 47. Li, R., et al., *Interstitial flow promotes macrophage polarization toward an M2 phenotype*. Molecular  
558 *Biology of the Cell*, 2018. **29**(16): p. 1927-1940.
- 559 48. Lv, R., Q. Bao, and Y. Li, *Regulation of M1-type and M2-type macrophage polarization in RAW264.7 cells*  
560 *by Galectin-9*. Molecular Medicine Reports, 2017. **16**(6): p. 9111-9119.
- 561 49. Debnath, J., S.K. Muthuswamy, and J.S. Brugge, *Morphogenesis and oncogenesis of MCF-10A mammary*  
562 *epithelial acini grown in three-dimensional basement membrane cultures*. Methods, 2003. **30**(3): p. 256-  
563 268.
- 564 50. Schindelin, J., et al., *Fiji: an open-source platform for biological-image analysis*. Nature Methods, 2012.  
565 **9**(7): p. 676-682.

566

567 **Figure 1.**

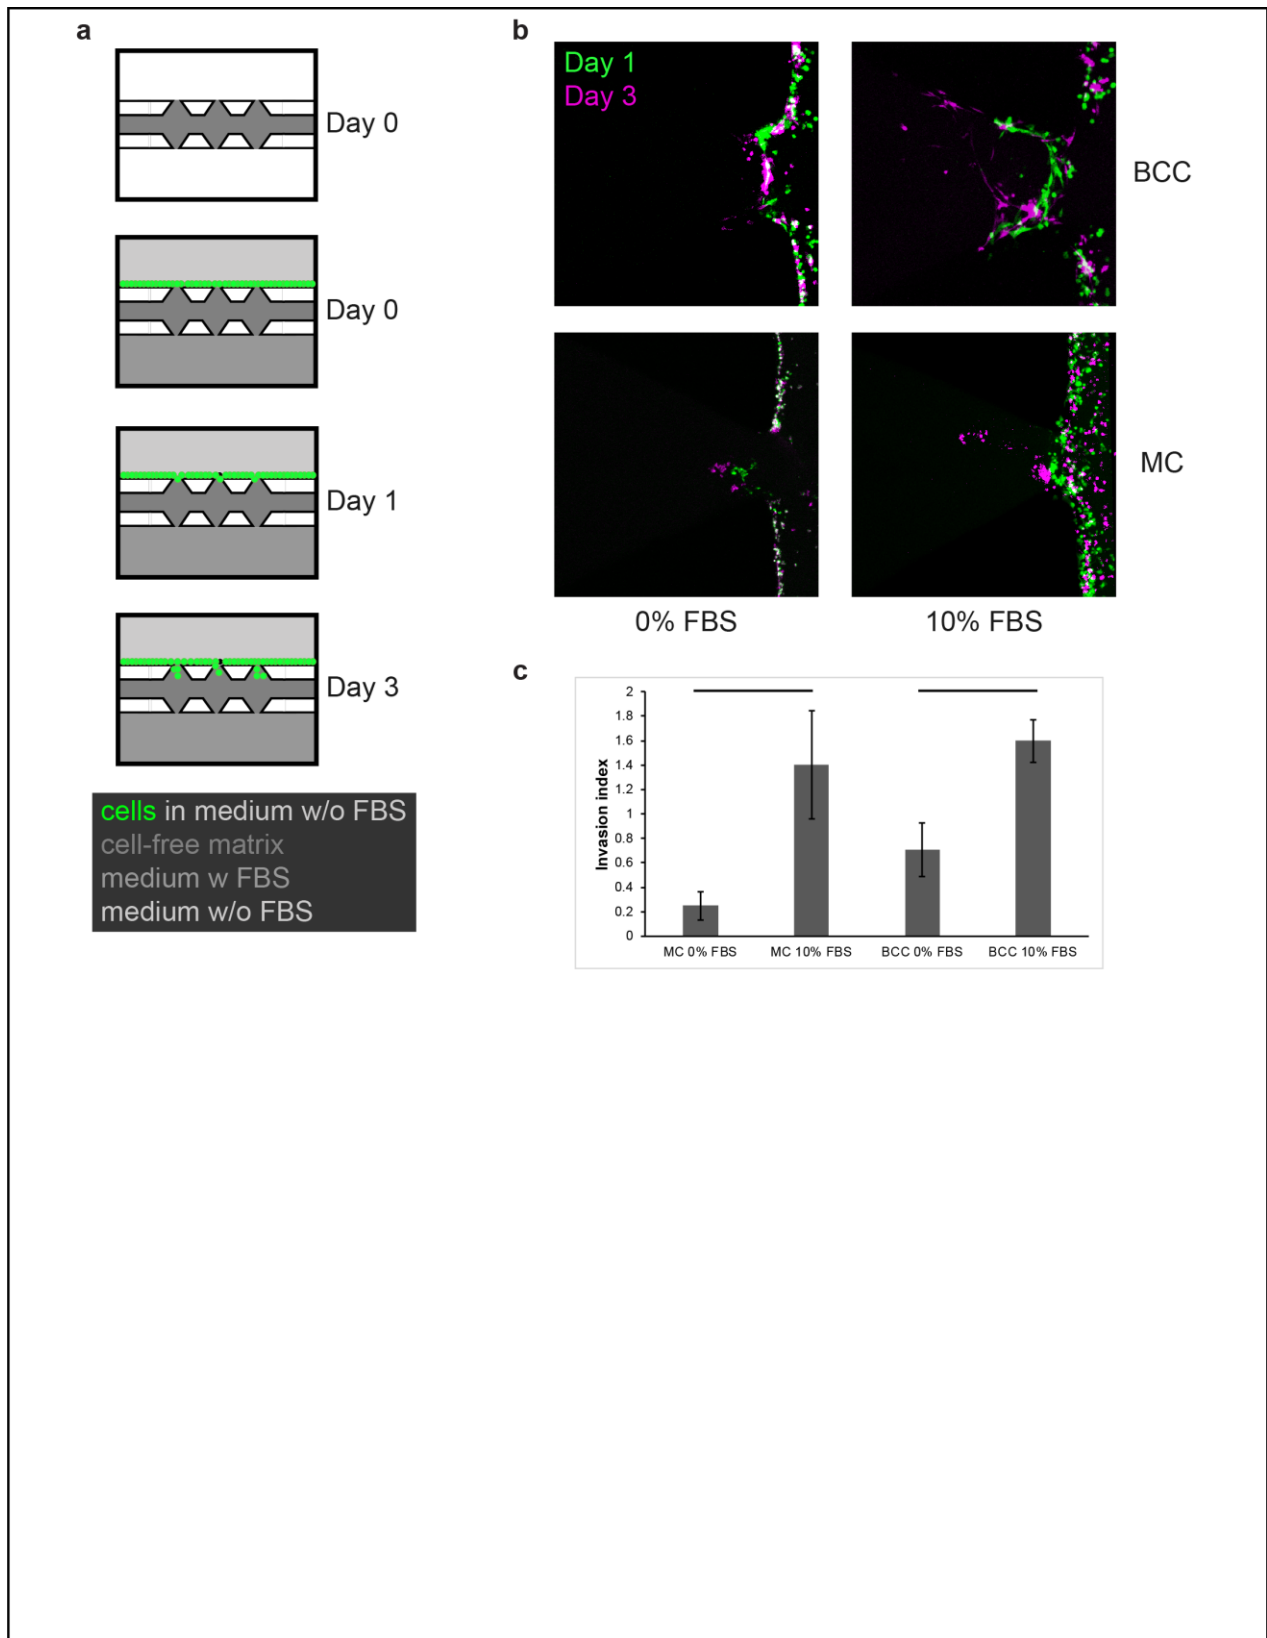

568

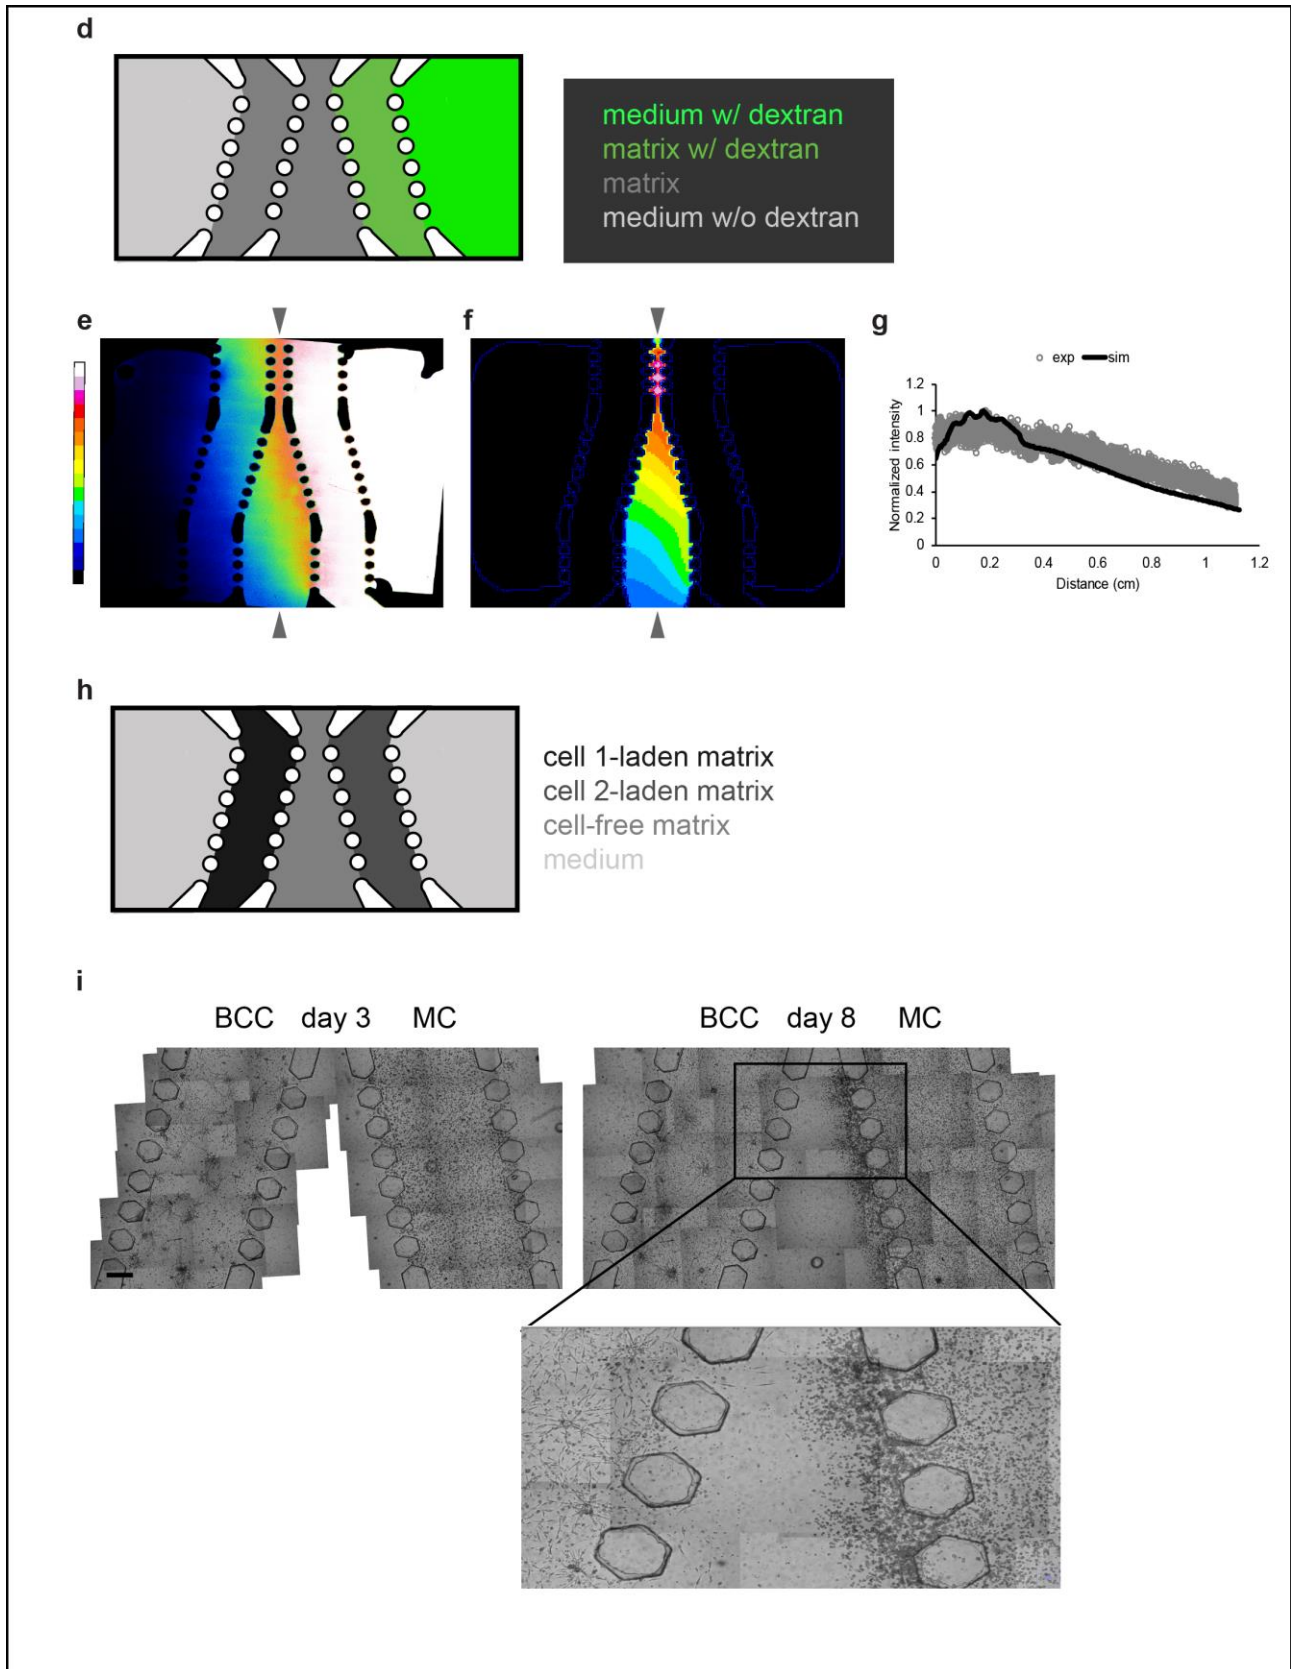



570 **Figure 1. BCC cells did not show chemotaxis towards MC whereas MC showed chemotaxis**  
571 **towards BCC.** (a) Cell-on-a-chip design (IC-chip) to test invasion and migration capacity of BCC and  
572 MC (not drawn to scale). Cell-free matrix was loaded into the middle channel. Either culture medium  
573 with FBS or serum-free medium was loaded into the bottom channel. Cells suspended in serum-free  
574 medium were loaded to the top channel. (b) Confocal images of BCC and MC at the medium-matrix  
575 interface and in the matrix across the serum-free medium (0% FBS) or culture medium with 10% FBS  
576 as chemoattractant on Day 1 and Day 3. (c) Prominent migration of MC and BCC towards FBS but not  
577 serum free medium. Horizontal bars show significant differences between the serum-free and FBS  
578 groups for each cell type (mean  $\pm$  s.e.m. n = 3-13). (d) Cell-on-a-chip design (DDI-chip) to test the  
579 diffusion of the dextran molecule (not drawn to scale). Cell-free matrix was loaded into the middle  
580 channel. Dextran-laden matrix was loaded into the side channel adjacent to the middle channel.  
581 Dextran-free matrix was loaded into the other side channel. The reservoir neighbouring the dextran-  
582 laden matrix channel was filled with medium containing dextran. The other reservoir neighbouring the  
583 free matrix was filled with dextran-free medium. (e) Fluorescence image of the diffusion of 10 kDa  
584 fluorescent dextran in the DDI-chip at day one. (f) Simulation result of the diffusion of 10 kDa dextran  
585 molecule in the DDI-chip at day one, generated by VCell. (g) Gradient profiles of the dextran molecule  
586 along the distance marked by grey arrowheads in the experimental and simulation results. (h) Cell-on-  
587 a-chip design (DDI-chip) to test distant interactions (not drawn to scale). Cell-free matrix was loaded  
588 into the middle channel. Cell-laden matrices were loaded into channels on either side of the middle  
589 channel. The two reservoirs neighbouring the cell-laden channels were filled with cell culture medium.  
590 (i) Representative image for a DDI-chip loaded with BCC and MC (n = 6 cell-on-a-chip devices). (Scale  
591 bars, 500  $\mu$ m.)

592

593

Figure 2.

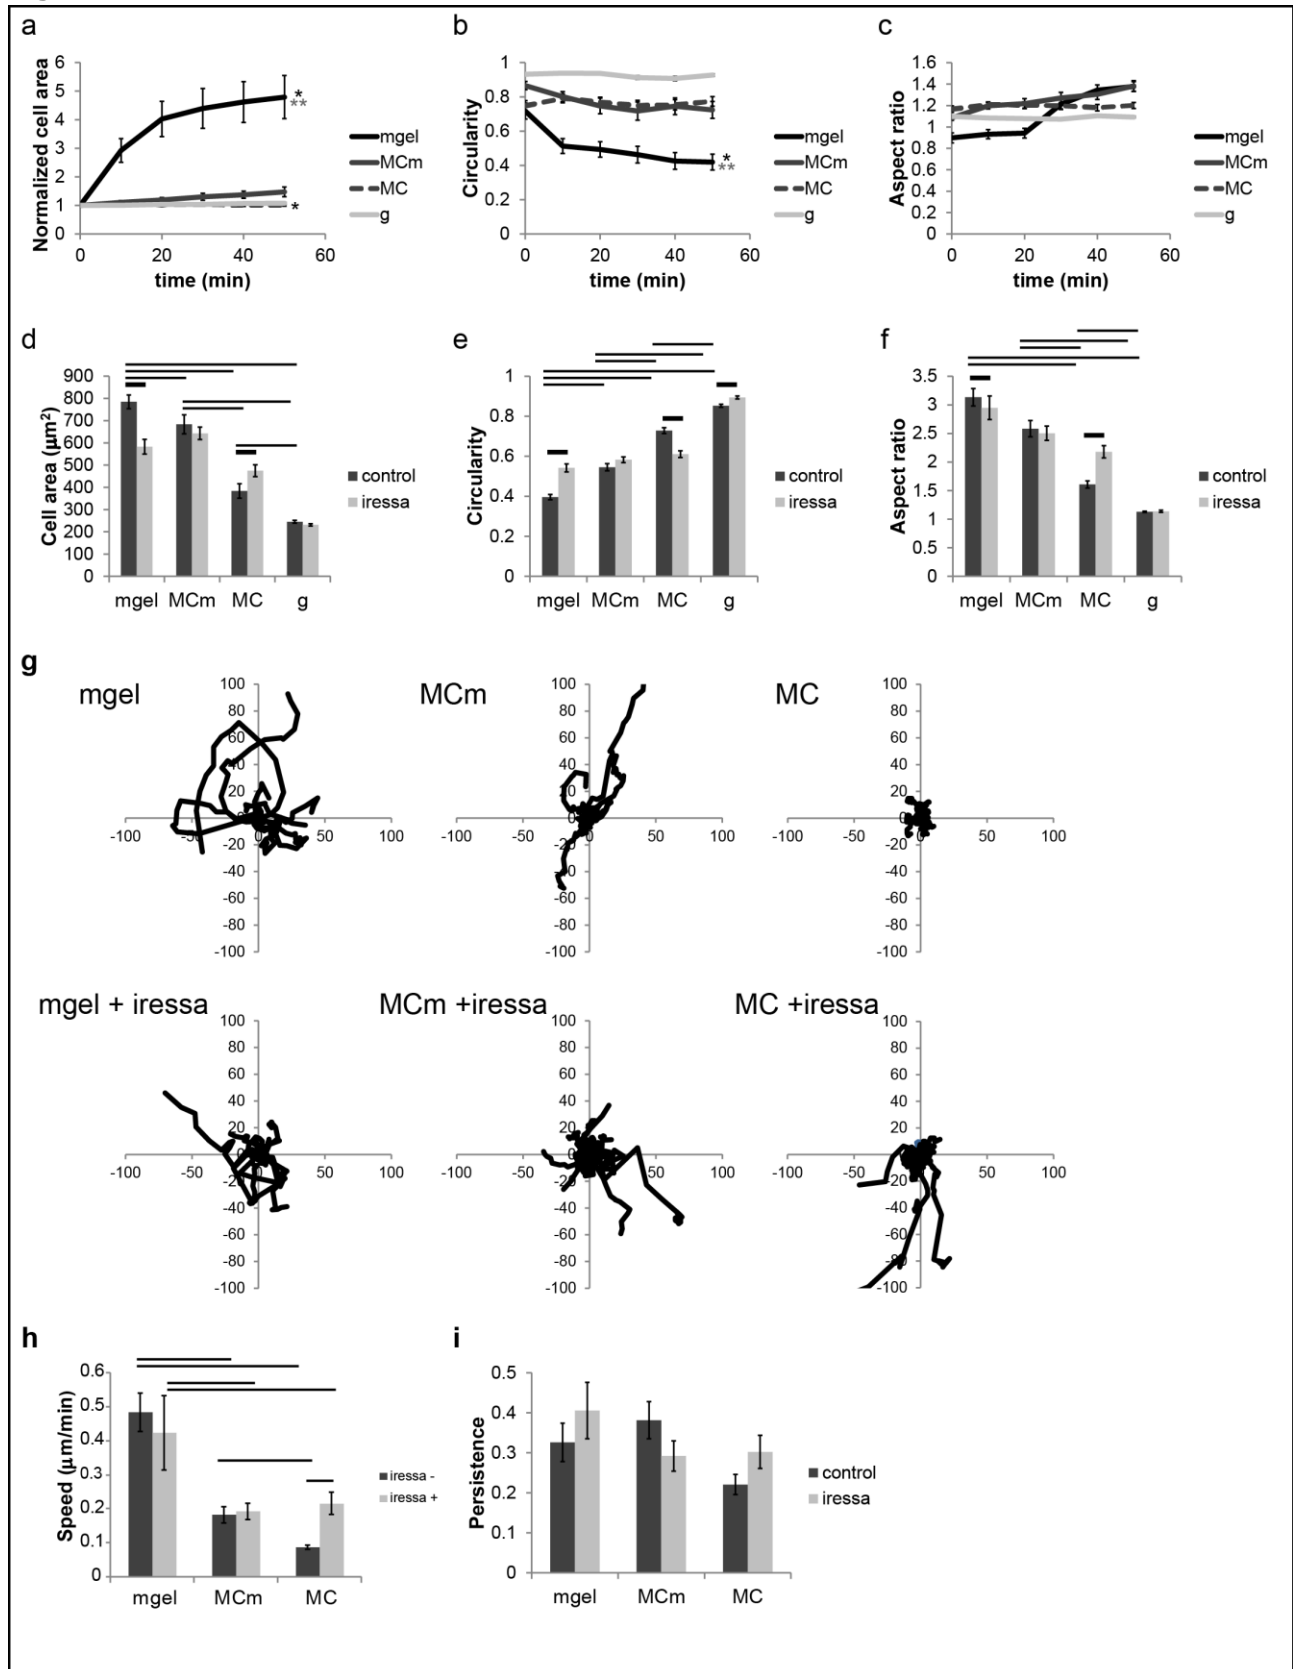

594

595 **Figure 2. Macrophages but not macrophage-derived-matrix modulated adhesion and motility of**  
596 **BCC in an EGF-dependent manner.** Quantification of (a) area, (b) circularity and (c) aspect ratio of  
597 cells during the first 50 minutes of adhesion (mean  $\pm$  s.e.m. n = 18, 24, 23, 6 cells). Quantification of (d)  
598 area, (e) circularity and (f) aspect ratio of cells at 6 hours of adhesion in the presence and absence of  
599 iressa (mean  $\pm$  s.e.m. n = 283, 145, 213, 97, 185, 255, 182, 130 cells). (g) Cell tracks of BCC motility  
600 on mgel, MCM, MC and glass surfaces in the absence and presence of iressa (IR) during 5 hours of  
601 live cell imaging (for n = 15-29 cells). Quantification of (h) average speed and (i) persistence of cells in  
602 the presence and absence of iressa (mean  $\pm$  s.e.m. n = 20, 22, 29, 15, 24, 23 cells). Asterisks show  
603 significant differences between t = 0 and 50 minutes. Double asterisks show significant differences  
604 between matrigel and all other three surfaces. Horizontal bars show significant differences between  
605 control and iressa groups, all of which are not shown for clarity, but are available in Supplementary  
606 Excel File 1.

607

**Figure 3.**

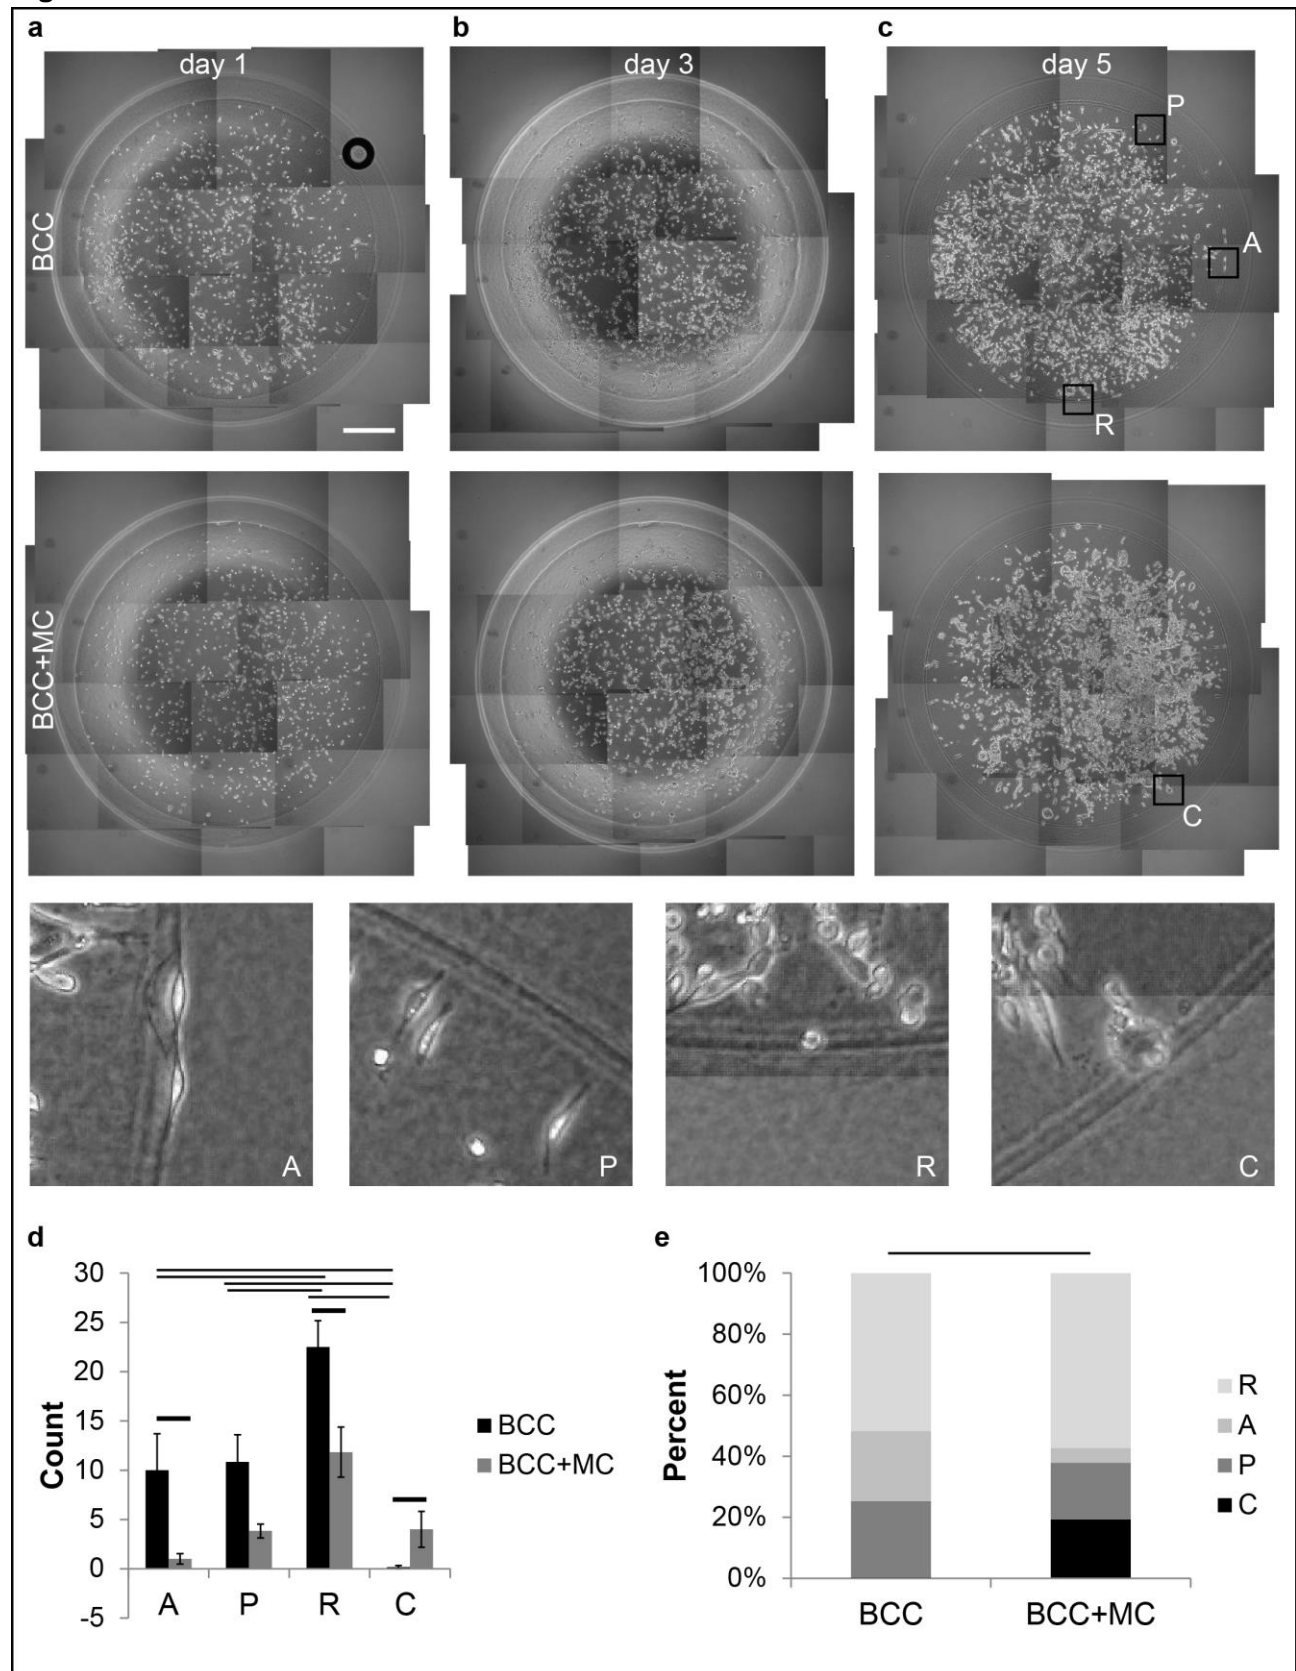

608

f

|    | BCC | BCC+MC | Significance* |
|----|-----|--------|---------------|
| R% | 52  | 57     | p>0.05        |
| A% | 23  | 5      | p<0.05        |
| P% | 25  | 19     | p>0.05        |
| C% | 0   | 19     | p<0.05        |

\* Two sample t-test between percents

609

610 **Figure 3. Co-culture of BCC with macrophages in collagen changed their multicellular**  
611 **organization.** Presence of macrophages decreased the number of round cells (p<0.015) and  
612 increased the number of clusters per hydrogel drop (p<0.041), respectively and changed the percentile  
613 distribution of structures ( $\chi^2$  test p<5.77E-14). The organization of BCC alone or with the presence of  
614 macrophages in collagen hydrogel drops on day 1 (a), day 3 (b) and day 5 (c). (Scale bars, 500  $\mu$ m.) A:  
615 elongated and along, P: elongated and perpendicular, R: round, C: clusters along the cell-laden  
616 hydrogel drop border. (d) The number of the A, P, R, C structures on BCC alone and BCC co-culture  
617 with MCC on day 5 (mean  $\pm$  s.e.m. n = 261, 124 structures). (e) The percentile distribution of the  
618 structures ( $\chi^2$  test). Horizontal bars show significant differences. (f) Significances of the changes in the  
619 individual percentiles of R, A, P, C structures of BCC cultured in collagen alone or in the presence of  
620 macrophages (Two sample t-test between percents).

621

622

623

**Figure 4.**

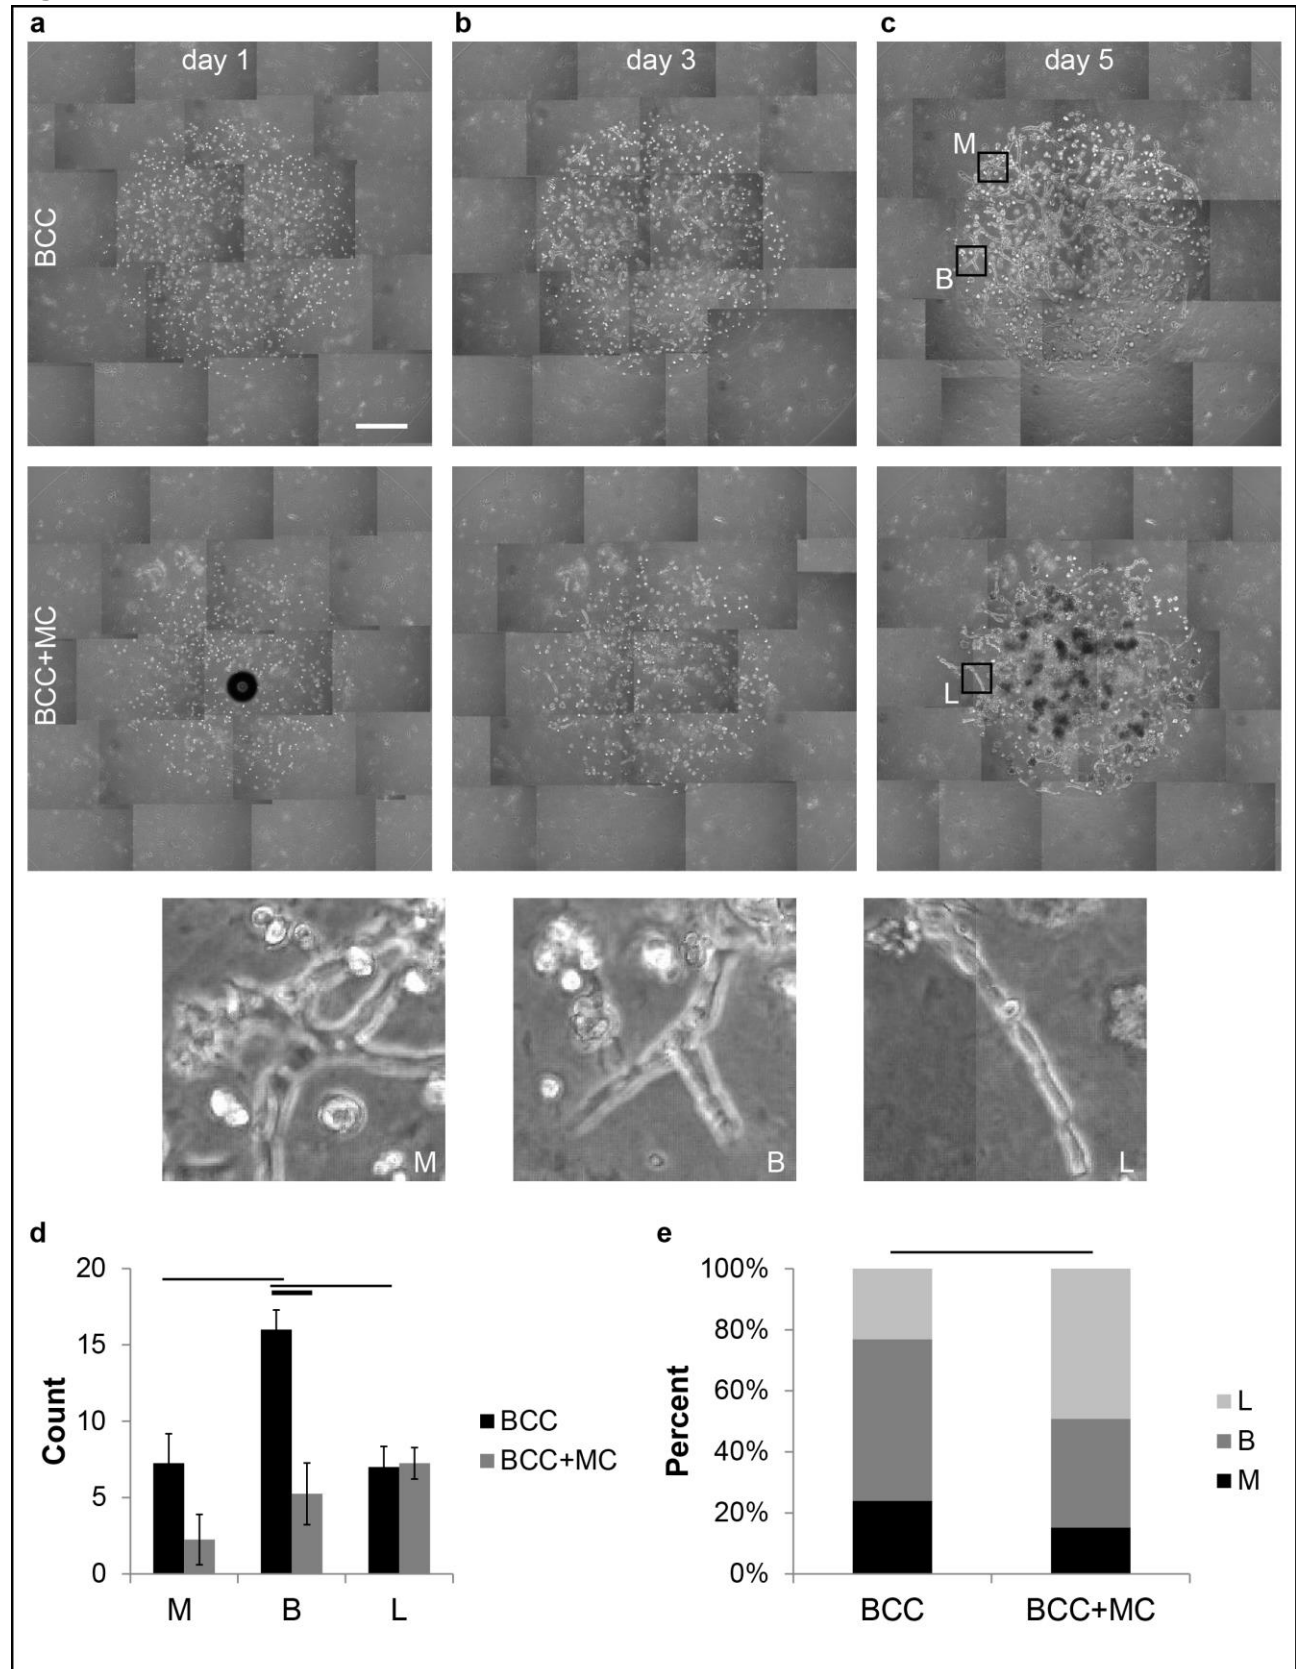

624

**f**

|    | BCC | BCC+MC | Significance* |
|----|-----|--------|---------------|
| L% | 23  | 49     | p<0.05        |
| B% | 53  | 36     | p<0.05        |
| M% | 24  | 15     | p>0.05        |

\* Two sample t-test between percents

625

626 **Figure 4. Co-culture of BCC with macrophages in matrigel changed their multicellular**  
627 **organization.** Presence of macrophages decreased the number of branched structures of BCC per  
628 hydrogel drop 3-fold (p<0.029) and changed the percentile distribution of structures ( $\chi^2$  test p<0.002).  
629 The multicellular organization of BCC in matrigel hydrogel drops alone or with the presence of  
630 macrophages on day1 (a), day 3 (b) and day5 (c). (Scale bars, 500  $\mu$ m.) M: star-like multicellular  
631 complexes, B: branched structures, L: lines of cells. (d) The number of the M, B, L structures for BCC  
632 alone and BCC co-culture with MCC on day 5 (mean  $\pm$  s.e.m. n = 121, 59 structures. (e) The percentile  
633 distribution of the structures ( $\chi^2$  test). Horizontal bars show significant differences. (f) Significances of  
634 the changes in the individual percentiles of L, B, M structures of BCC cultured in matrigel alone or in the  
635 presence of macrophages (Two sample t-test between percents).

636

637

638

Figure 5.

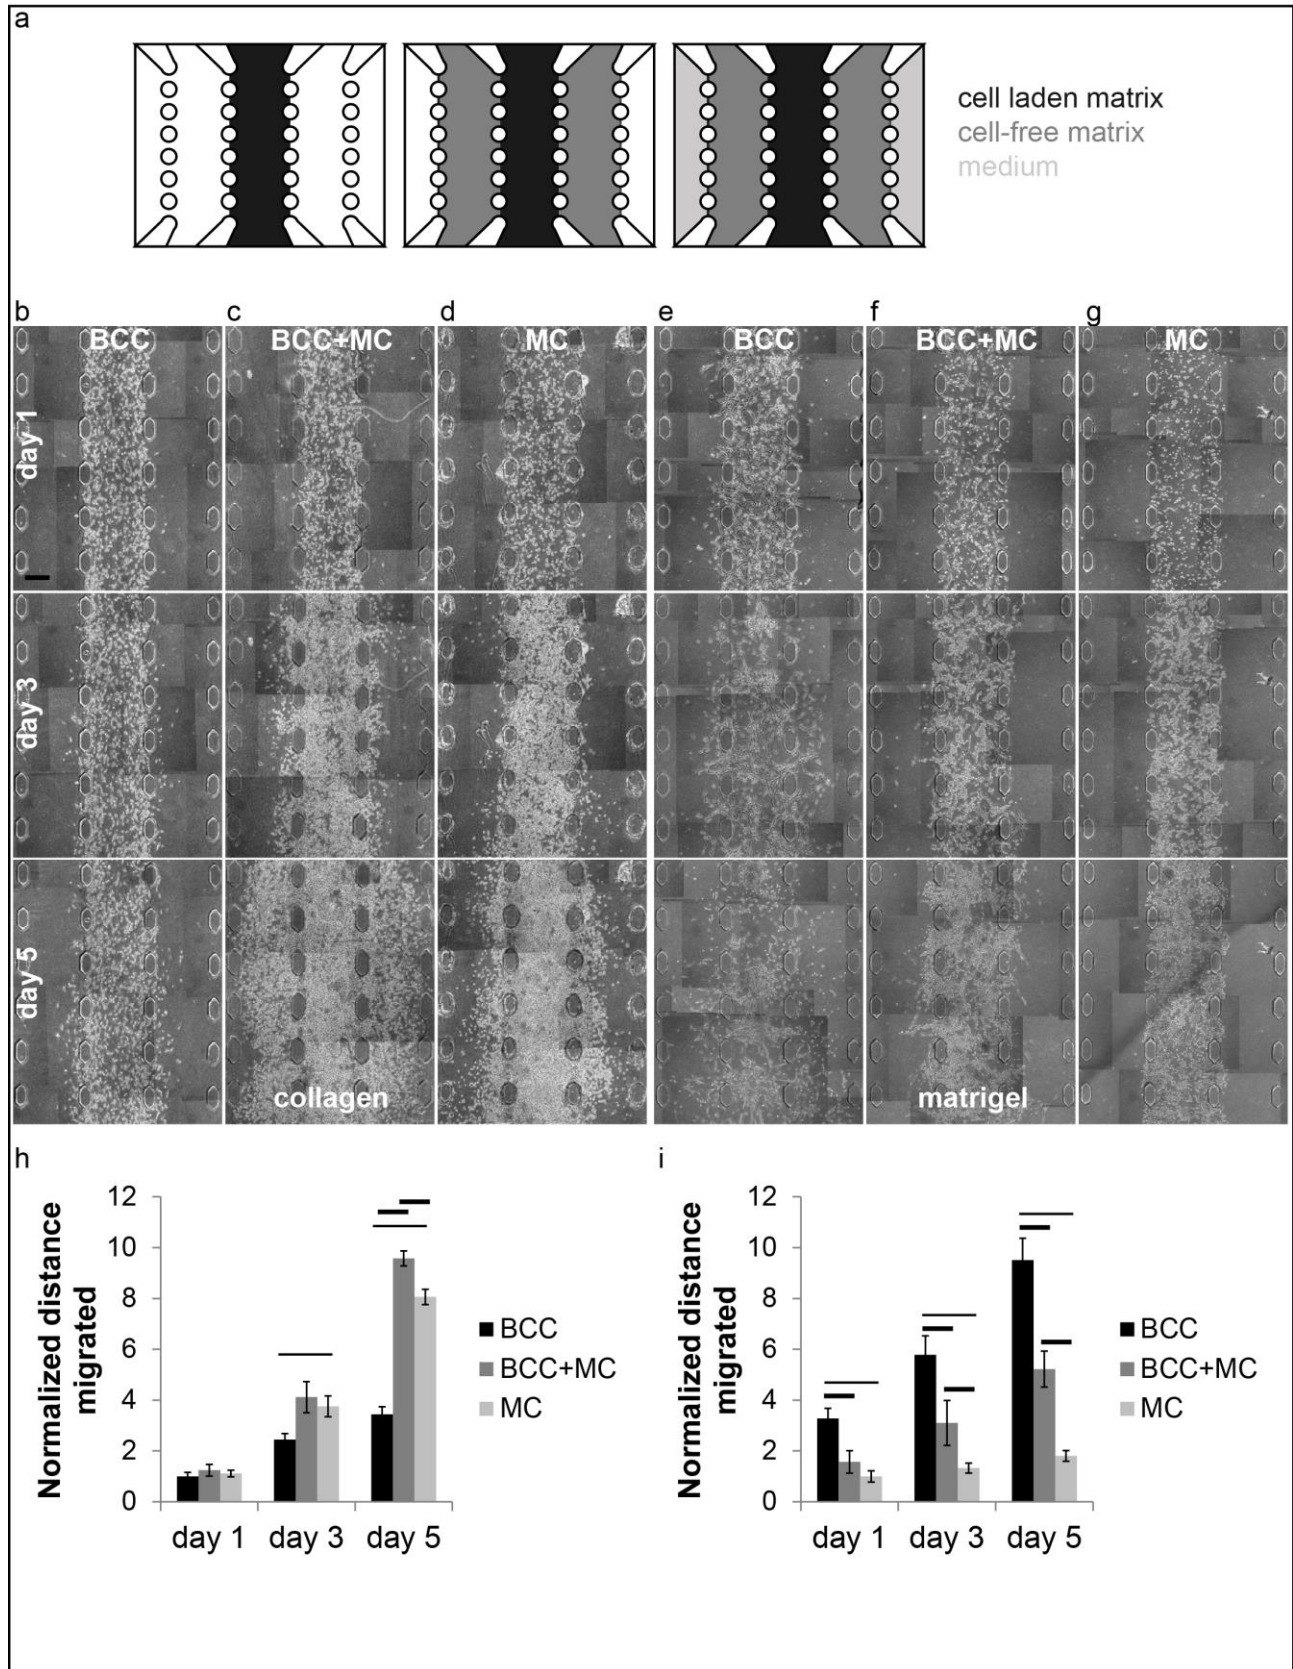

639



640 **Figure 5. Macrophages promoted and reduced migration of BCC in collagen and matrigel,**  
641 **respectively.** (a) Cell-on-a-chip design to test migration of alone and co-cultures of BCC and  
642 macrophages (not drawn to scale). Cell-laden matrices were loaded into the middle channel. Cell-free  
643 matrices were loaded into the adjacent channels on both sides of the middle channel. The reservoir  
644 channels neighbouring the cell-free hydrogel channels were filled with cell culture medium. (b) – (d)  
645 BCC alone, BCC and macrophages or macrophages alone in collagen were loaded into the middle  
646 channel of a cell-on-a-chip device. (e) – (g) BCC alone, BCC and macrophages or macrophages alone  
647 in matrigel were loaded into the middle channel of a cell-on-a-chip. Cell-free channels were loaded with  
648 the corresponding matrices. Quantification of distances migrated by cells in collagen (h) and matrigel (i)  
649 matrices (mean  $\pm$  s.e.m. n = 16, 8 ROIs). Horizontal bars show significant differences between groups,  
650 all of which are not shown for clarity, but are available in Supplementary Excel File 1. (Scale bars, 250  
651  $\mu$ m.)

652

653

**Figure 6.**

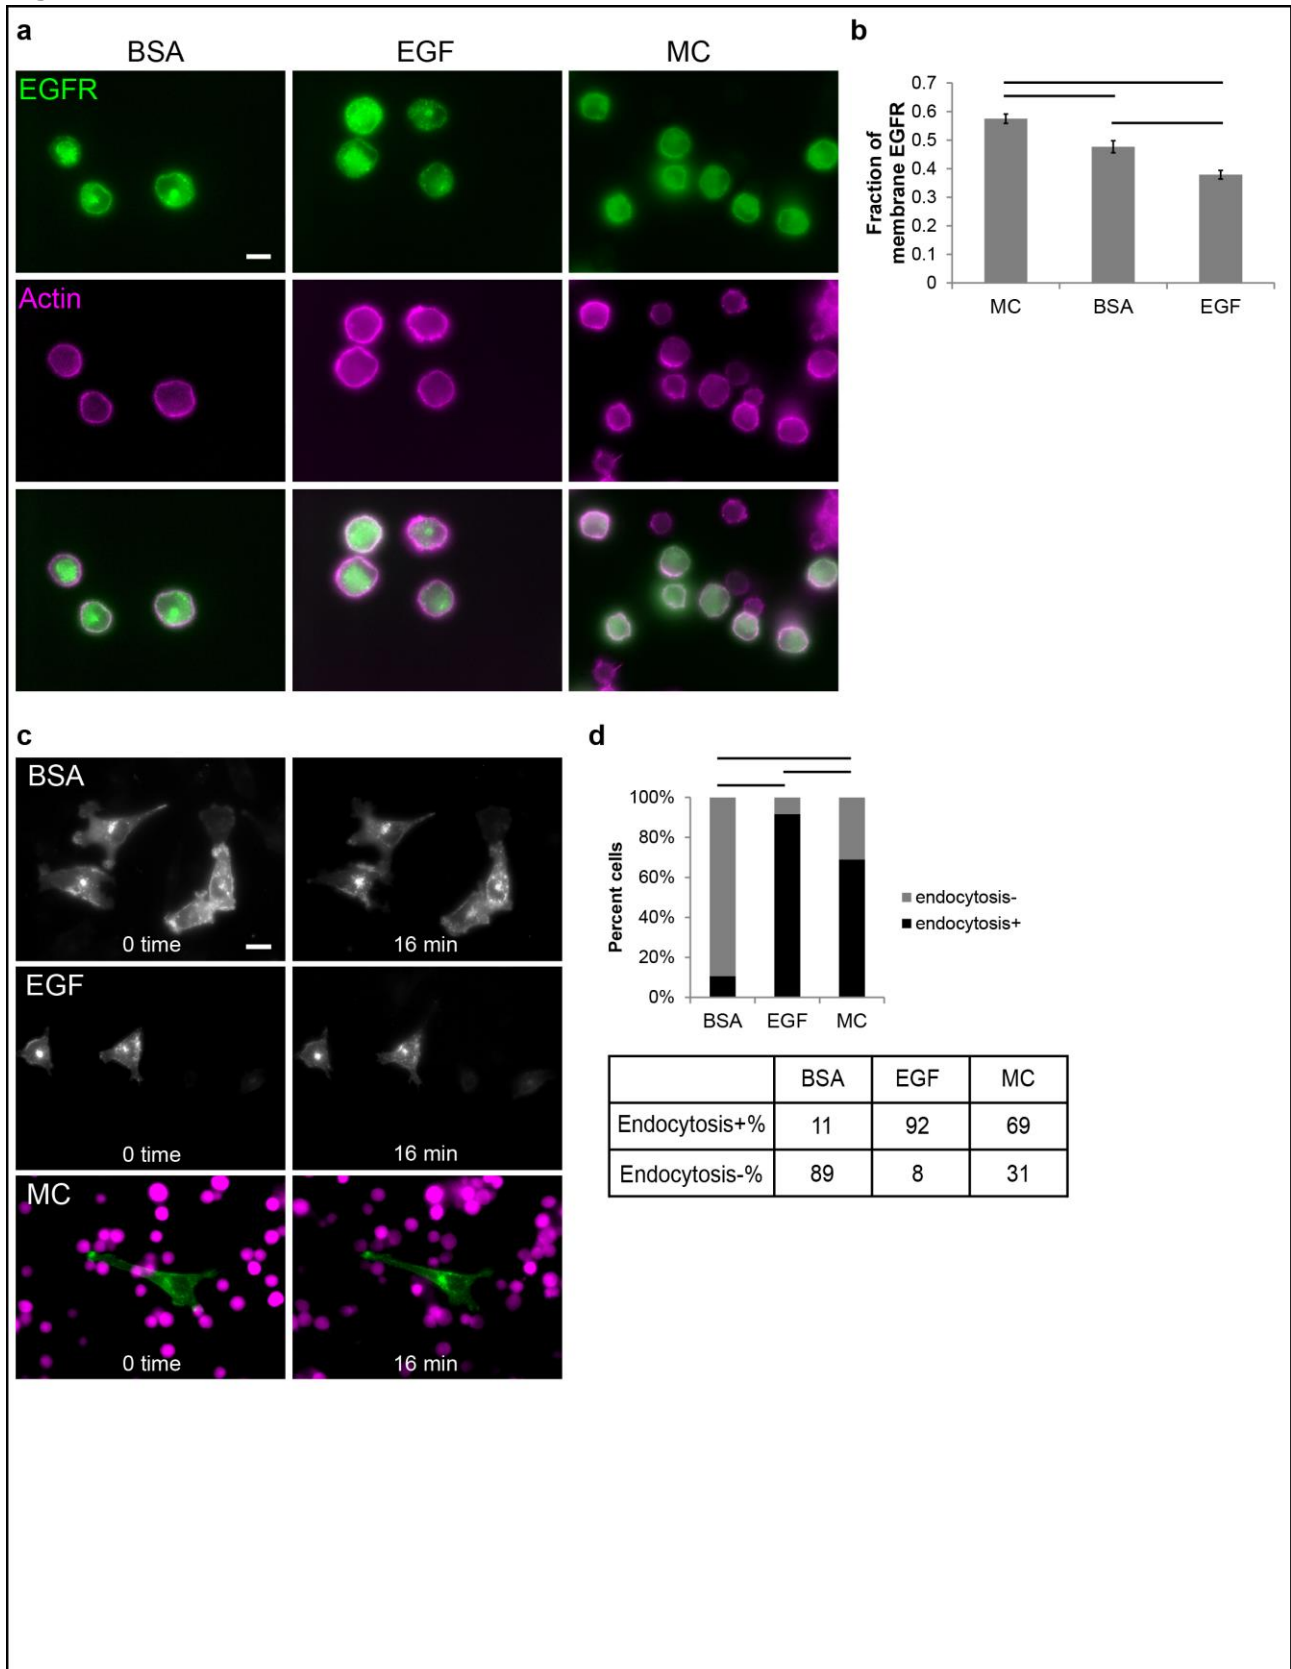

654

655 **Figure 6. Adherent but not suspended BCC endocytosed EGFR when in contact with**  
656 **macrophages.** (a) Starved and suspended BCC were treated with BSA, EGF or macrophages for 15  
657 minutes in suspension, fixed and stained. Representative immunostaining images for EGFR and actin  
658 localization. (Scale bars, 10  $\mu$ m.) (b) The fraction of membrane EGFR derived from  
659 immunofluorescence signal (mean  $\pm$  s.e.m. n = 35, 45, 27 cells). (c) Representative images for 0th and  
660 16th minute of live imaging of EGFR endocytosis in adherent BCC transfected with EGFR-GFP,  
661 starved and treated with EGF or macrophages. (Scale bars, 10  $\mu$ m.) (d) The percentage of the BCC  
662 cells showing EGFR endocytosis when treated with BSA, EGF or macrophages ( $\chi^2$  test for n = 66, 24,  
663 42 cells). Horizontal bars show significant differences.

664

665 **Figure 7.**

Current Model

Paracrine loop

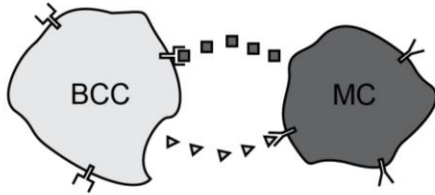

BCC: Breast cancer cell  
MC: Macrophage  
□: EGF receptor  
■: EGF  
∠: CSF-1 receptor  
▷: CSF-1

Proposed Model

Paracrine - Juxtacrine loop

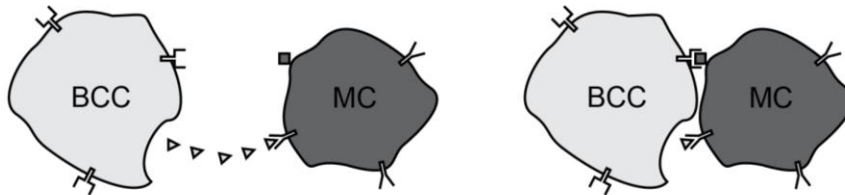

666

667

668 **Figure 7. Current and proposed models for interaction of BCC with macrophages.** In the current  
669 model (top), BCC show chemotaxis towards macrophage-derived-EGF and macrophages show  
670 chemotaxis towards BCC-derived-CSF-1. In the proposed model (bottom), macrophage-derived-EGF is  
671 associated with macrophages and direct contact is required for interaction of macrophage-derived-EGF  
672 and EGFR on BCC. Macrophages show chemotaxis towards BCC-derived-CSF-1, which is secreted.

673

674 **Table 1.**

|             |                       | Cells | Matrix | CM     | Total  |
|-------------|-----------------------|-------|--------|--------|--------|
| Macrophages | EGF %                 | 92    | 7      | 1      | 100    |
|             | Total Protein %       | 62    | 37     | 1      | 100    |
|             | EGF (ng/ml)           | 0.096 | 0.007  | 0.0009 | 0.1039 |
|             | Total Protein (mg/ml) | 4.667 | 2.775  | 0.073  | 7.515  |
| BCC         | CSF-1 %               | 53    | 12     | 35     | 100    |
|             | Total Protein %       | 81    | 19     | 1      | 100    |
|             | CSF-1 (ng/ml)         | 0.837 | 0.19   | 0.544  | 1.571  |
|             | Total Protein (mg/ml) | 4.322 | 1.001  | 0.036  | 5.359  |

675

676 **Table 1. CSF-1 but not EGF was secreted.** ELISA and total protein analysis for BCC, BCC-derived  
677 matrix, BCC-conditioned medium, MC, MC-derived matrix and MC-conditioned medium. Total % can  
678 exceed 100 due to rounding. The total protein and EGF as well as CSF-1 concentrations from which  
679 the percentages were derived are also given for the corresponding components of MC and BCC  
680 cultures.

681

682 **Supplementary Figure S1.**

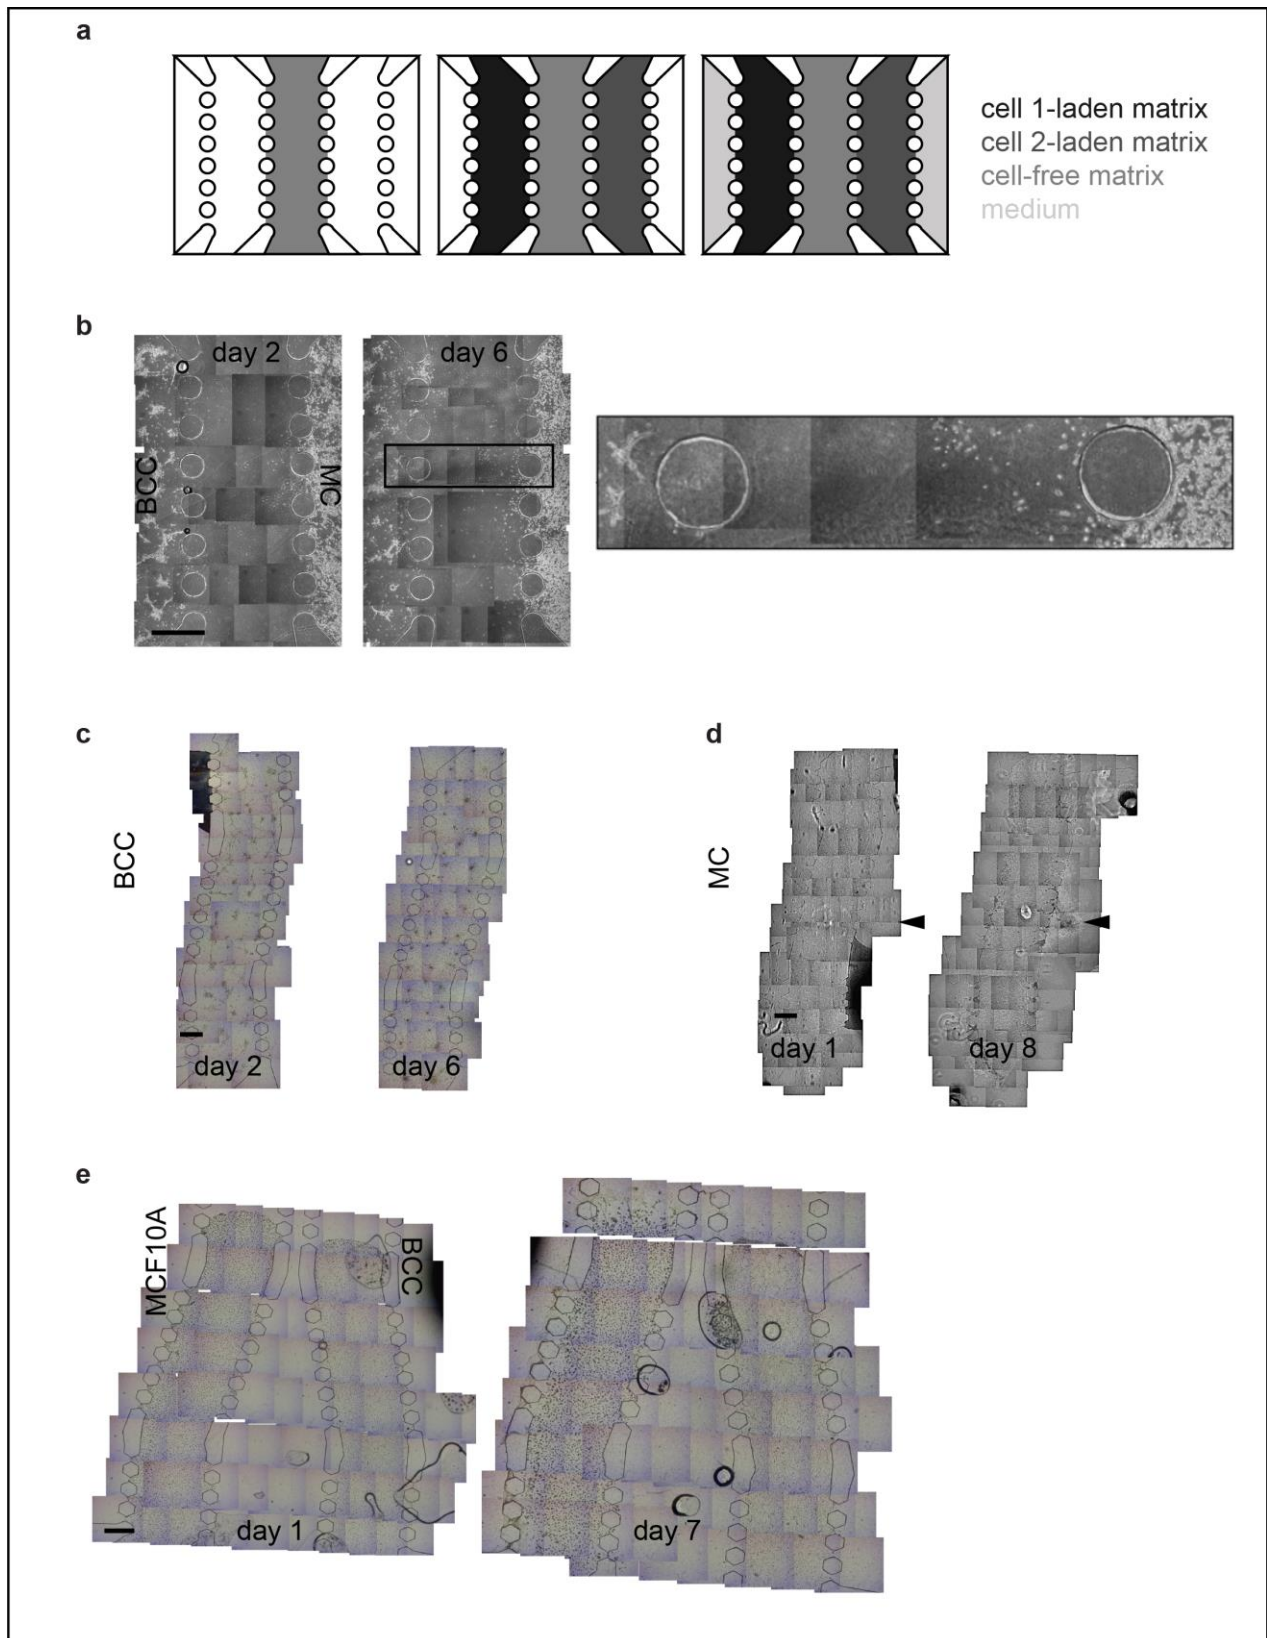

683

684 **Figure S1.** (a) Cell-on-a-chip design to test distant interactions (not drawn to scale). Cell-free matrix  
685 was loaded into the middle channel. Cell-laden matrices were loaded into channels on either side of the  
686 middle channel. The two reservoirs neighbouring the cell-laden channels were filled with cell culture  
687 medium. (b) Representative image for a cell-on-a-chip device where the cell-free middle channel had a  
688 constant width ( $n = 2$  cell-on-a-chip devices). Image on the right shows the zoom-in region marked with  
689 a rectangle on the image on the left. Representative images of control experiments where only BCC (c)  
690 or only macrophages (MC) (d) or BCC across normal mammary epithelial cells (MCF10A) (e) were  
691 cultured in the DDI-chip ( $n = 10$  cell-on-a-chip devices). Cell-free matrix was loaded into the middle  
692 channel. Cell-laden matrices were loaded into side channels adjacent the middle channel. For only  
693 BCC (c) and only MC (d), one side channel was loaded with cell-laden matrix while the other side  
694 channel was loaded with cell-free matrix. The leakage of MC which was apparent on day 1 in (d) was  
695 marked with black arrowheads. These cells therefore did not really migrate by day 8. In the control chip  
696 with BCC and MCF10A (e), cell-laden matrices were loaded into sides channel in the same chip, testing  
697 their distant interaction. The two reservoirs neighbouring the cell-laden channels were filled with cell  
698 culture medium. Scale bars 1 mm.

699

## 700 **Supplementary Videos**

701 **Supplementary Movie S1.** Simulation of diffusion of fluorescent dextran into the middle channel of the  
702 DDI-chip

703 **Supplementary Movie S2.** EGFR endocytosis in BCC transfected with EGFR-GFP and starved.

704 **Supplementary Movie S3.** EGFR endocytosis in BCC transfected with EGFR-GFP, starved and  
705 treated with EGF.

706 **Supplementary Movie S4.** EGFR endocytosis in BCC transfected with EGFR-GFP, starved and  
707 treated with fluorescently labelled macrophages.

708

## 709 **Supplementary Datasets**

710 **Supplementary Excel File 1.** All statistical test results.

711 **Supplementary Excel File 2.** All data used for statistical analysis.
